# Supplementary material for: Unravelling the impact of sulfur atom oxidation and donor–acceptor effects on the performance of blue TADF emitters: a detailed computational study
Source: Royal Society of Chemistry journal article supplement (doi:10.1039/d4me00035h), 2024-01-01
Supplement: d4me00035h1.pdf [file d4me00035h1.pdf]

## Supporting Information

### Unravelling the Impact of Sulfur atom Oxidation and Donor-Acceptor Effects on the Performance of Blue TADF Emitters: A Detailed Computational Study

Singaravel Nathiya\*

\*Department of Chemistry, SRM Institute of Science and Technology, Kattankulathur - 603 203, Tamil Nadu, India.

\*Corresponding author: E-mail: [nathiya421@gmail.com](mailto:nathiya421@gmail.com).

#### CONTENT CAPTIONS

| Tables          |                                                                                                                                                                                                                                             | Page No |
|-----------------|---------------------------------------------------------------------------------------------------------------------------------------------------------------------------------------------------------------------------------------------|---------|
| <b>Table S1</b> | Calculated the HOMO, LUMO energies, and $E_g$ gap of reference molecules along with experimental values using 6-31+G* level of theory                                                                                                       | S3      |
| <b>Table S2</b> | Calculated the HOMO, LUMO energies, and $E_g$ gap of reference molecules along with experimental values using 6-31+G* level of theory                                                                                                       | S3      |
| <b>Table S3</b> | Calculated the vertical singlet ( $S_1$ ) and triplet ( $T_1$ ) energies, singlet-triplet energy differences ( $\Delta E_{ST}$ ) of reference molecules along with experimental values                                                      | S4      |
| <b>Table S4</b> | Calculated bond Lengths (Å), bond angle (°), and dihedral Angles (°), between the donor and the acceptor at optimized $S_0$ states at B3LYP/6-31+G* level of theory                                                                         | S5      |
| <b>Table S5</b> | The calculated HOMO and LUMO molecular orbital contribution (%) of PXZ, PTZ, DMAC, and DPA substituted molecules at M06/6-31+G* level of theory                                                                                             | S6      |
| <b>Table S6</b> | Calculated the vertical singlet ( $S_1$ ) and triplet ( $T_1$ ) energies, singlet-triplet energy differences ( $\Delta E_{ST}$ ) at B3LYP, PBE0, and M06/6-31+G* level of theory                                                            | S7      |
| <b>Table S7</b> | Calculated the $\Delta E_{ST}$ , oscillator strength (f), transition dipole moment ( $\mu$ ), mean separation distance (Å), overlap extent (%) for vertical singlet ( $S_1$ ) and triplet ( $T_1$ ) energies at M06/6-31+G* level of theory | S8      |
| <b>Table S8</b> | Calculated intramolecular reorganization energies for reference molecules at M06/6-31G* level of theory                                                                                                                                     | S17     |

|                  |                                                                                                                                                                               |     |
|------------------|-------------------------------------------------------------------------------------------------------------------------------------------------------------------------------|-----|
| <b>Figure S1</b> | Optimized geometries of designed molecules at B3LYP/6-31+G* level of theory                                                                                                   | S10 |
| <b>Figure S2</b> | Frontier molecular orbital (FMO) and optimized geometries of selected donors (iso-surface value = 0.02 au) at B3LYP/6-31+G* level of theory                                   | S11 |
| <b>Figure S3</b> | Frontier molecular orbital (FMO) and optimized geometries of selected acceptors (iso-surface value = 0.02 au) at B3LYP/6-31+G* level of theory                                | S12 |
| <b>Figure S4</b> | Natural transition orbitals (NTOs) of the S <sub>1</sub> and T <sub>1</sub> state for PTZ substituted molecules (iso-surface value = 0.02 au) at M06/6-31+G* level of theory  | S13 |
| <b>Figure S5</b> | Natural transition orbitals (NTOs) of the S <sub>1</sub> and T <sub>1</sub> state for DMAC substituted molecules (iso-surface value = 0.02 au) at M06/6-31+G* level of theory | S13 |
| <b>Figure S6</b> | Natural transition orbitals (NTOs) of the S <sub>1</sub> and T <sub>1</sub> state for DPA substituted molecules (iso-surface value = 0.02 au) at M06/6-31+G* level of theory  | S14 |
| <b>Figure S7</b> | Spin-orbit coupling values (in cm <sup>-1</sup> ) between singlet and triplet states of T <sub>1</sub> geometry calculated at the M06/ def2-SVP level of theory               | S15 |

**Table S1.** Calculated the HOMO, LUMO energies, and  $E_g$  gap of reference molecules along with experimental values using 6-31+G\* level of theory. (All energies are in eV)

| Molecules               | BP86  | O3LYP | B3LYP | PBE0  | M06   | BMK   | M06-2X | CAM-B3LYP | WB97XD | M06-HF | Exp.  |
|-------------------------|-------|-------|-------|-------|-------|-------|--------|-----------|--------|--------|-------|
| <b>HOMO</b>             |       |       |       |       |       |       |        |           |        |        |       |
| PXZ-Ph-SO <sub>2</sub>  | -4.60 | -4.81 | -5.25 | -5.45 | -5.59 | -5.92 | -6.62  | -6.61     | -7.19  | -8.43  | -5.59 |
| PTZ-Ph-SO <sub>2</sub>  | -4.81 | -5.06 | -5.48 | -5.67 | -5.72 | -6.20 | -6.74  | -6.83     | -7.34  | -8.42  | -6.11 |
| DMAC-Ph-SO <sub>2</sub> | -4.90 | -5.13 | -5.53 | -5.75 | -5.84 | -5.13 | -6.81  | -6.87     | -7.41  | -8.41  | -5.92 |
| DPA-Ph-SO <sub>2</sub>  | -4.88 | -5.13 | -5.49 | -5.66 | -5.77 | -6.11 | -6.65  | -6.76     | -7.27  | -8.21  | -5.89 |
| <b>LUMO</b>             |       |       |       |       |       |       |        |           |        |        |       |
| PXZ-Ph-SO <sub>2</sub>  | -2.96 | -2.43 | -2.24 | -2.10 | -2.06 | -1.46 | -1.36  | -1.02     | -0.43  | -0.46  | -2.79 |
| PTZ-Ph-SO <sub>2</sub>  | -2.98 | -2.37 | -2.20 | -2.08 | -2.03 | -1.44 | -1.35  | -0.99     | -0.43  | -0.46  | -3.34 |
| DMAC-Ph-SO <sub>2</sub> | -2.87 | -2.28 | -2.10 | -1.96 | -1.93 | -2.28 | -1.23  | -0.88     | -0.30  | -0.33  | -2.92 |
| DPA-Ph-SO <sub>2</sub>  | -2.30 | -1.72 | -1.56 | -1.42 | -1.40 | -0.85 | -0.78  | -0.38     | -0.21  | -0.23  | -2.62 |
| <b>E<sub>g</sub></b>    |       |       |       |       |       |       |        |           |        |        |       |
| PXZ-Ph-SO <sub>2</sub>  | 1.63  | 2.38  | 3.01  | 3.35  | 3.53  | 4.46  | 5.26   | 5.59      | 6.76   | 7.97   | 2.80  |
| PTZ-Ph-SO <sub>2</sub>  | 1.83  | 2.69  | 3.28  | 3.59  | 3.69  | 4.77  | 5.39   | 5.84      | 6.92   | 7.97   | 2.77  |
| DMAC-Ph-SO <sub>2</sub> | 2.02  | 2.85  | 3.44  | 3.78  | 3.91  | 2.85  | 5.58   | 5.99      | 7.11   | 8.08   | 3.00  |
| DPA-Ph-SO <sub>2</sub>  | 2.57  | 3.42  | 3.94  | 4.24  | 4.37  | 5.26  | 5.87   | 6.38      | 7.48   | 7.99   | 3.27  |

**Table S2.** Calculated the HOMO, LUMO energies, and  $E_g$  gap of reference molecules using B3LYP functional along with different basis sets. (All energies are in eV)

| Molecules               | 6-31G* | 6-31G** | 6-31+G* | 6-31+G** | 6-311G* | 6-311G** | 6-311+G** |
|-------------------------|--------|---------|---------|----------|---------|----------|-----------|
| <b>HOMO</b>             |        |         |         |          |         |          |           |
| PXZ-Ph-SO <sub>2</sub>  | -4.90  | -4.91   | -5.25   | -5.26    | -5.16   | -5.17    | -5.33     |
| PTZ-Ph-SO <sub>2</sub>  | -5.21  | -5.21   | -5.48   | -5.48    | -5.45   | -5.45    | -5.53     |
| DMAC-Ph-SO <sub>2</sub> | -5.25  | -5.22   | -5.53   | -5.54    | -5.51   | -5.51    | -5.60     |
| DPA-Ph-SO <sub>2</sub>  | -5.21  | -5.22   | -5.49   | -5.50    | -5.46   | -5.47    | -5.56     |
| <b>LUMO</b>             |        |         |         |          |         |          |           |

|                         |       |       |       |       |       |       |       |
|-------------------------|-------|-------|-------|-------|-------|-------|-------|
| PXZ-Ph-SO <sub>2</sub>  | -1.88 | -1.89 | -2.10 | -2.25 | -2.17 | -2.18 | -2.30 |
| PTZ-Ph-SO <sub>2</sub>  | -1.86 | -1.87 | -2.08 | -2.21 | -2.13 | -2.14 | -2.25 |
| DMAC-Ph-SO <sub>2</sub> | -1.75 | -1.17 | -1.96 | -2.10 | -2.03 | -2.03 | -2.15 |
| DPA-Ph-SO <sub>2</sub>  | -1.16 | -1.17 | -1.56 | -1.56 | -1.44 | -1.45 | 1.61  |
| <b>E<sub>g</sub></b>    |       |       |       |       |       |       |       |
| PXZ-Ph-SO <sub>2</sub>  | 3.02  | 3.02  | 3.01  | 3.01  | 2.99  | 2.99  | 3.03  |
| PTZ-Ph-SO <sub>2</sub>  | 3.35  | 3.35  | 3.28  | 3.27  | 3.32  | 3.31  | 3.28  |
| DMAC-Ph-SO <sub>2</sub> | 3.50  | 4.04  | 3.44  | 3.44  | 3.48  | 3.48  | 3.45  |
| DPA-Ph-SO <sub>2</sub>  | 4.05  | 4.05  | 3.93  | 3.94  | 4.01  | 4.02  | 3.95  |

**Table S3.** Calculated the vertical singlet (S<sub>1</sub>) and triplet (T<sub>1</sub>) energies, singlet-triplet energy differences ( $\Delta E_{ST}$ ) of reference molecules along with experimental values using a 6-31+G\* basis set. (All energies are in eV)

| Molecules                                      | BP86 | O3LYP | B3LYP | PBE0 | M06         | BMK  | M06-2X | CAM-B3LYP | WB97XD | M06-HF | Exp.        |
|------------------------------------------------|------|-------|-------|------|-------------|------|--------|-----------|--------|--------|-------------|
| <b>Singlet (S<sub>1</sub>)</b>                 |      |       |       |      |             |      |        |           |        |        |             |
| PXZ-Ph-SO <sub>2</sub>                         | 1.67 | 2.19  | 2.50  | 2.68 | <b>2.74</b> | 3.19 | 3.40   | 3.51      | 3.67   | 4.11   | <b>2.73</b> |
| PTZ-Ph-SO <sub>2</sub>                         | 1.94 | 2.47  | 2.79  | 2.97 | <b>3.00</b> | 3.50 | 3.69   | 3.81      | 3.93   | 4.16   | <b>3.02</b> |
| DMAC-Ph-SO <sub>2</sub>                        | 2.08 | 2.57  | 2.87  | 3.04 | <b>3.10</b> | 3.53 | 3.72   | 3.83      | 3.98   | 4.36   | <b>3.00</b> |
| DPA-Ph-SO <sub>2</sub>                         | 2.72 | 3.12  | 3.42  | 3.45 | <b>3.44</b> | 3.76 | 3.94   | 3.99      | 3.97   | 4.23   | <b>3.30</b> |
| <b>Triplet (T<sub>1</sub>)</b>                 |      |       |       |      |             |      |        |           |        |        |             |
| PXZ-Ph-SO <sub>2</sub>                         | 1.66 | 2.18  | 2.49  | 2.66 | <b>2.74</b> | 3.11 | 3.27   | 2.84      | 2.99   | 3.59   | <b>2.65</b> |
| PTZ-Ph-SO <sub>2</sub>                         | 1.93 | 2.46  | 2.76  | 2.88 | <b>2.89</b> | 3.25 | 3.40   | 3.01      | 3.15   | 3.69   | <b>2.61</b> |
| DMAC-Ph-SO <sub>2</sub>                        | 2.07 | 2.56  | 2.86  | 3.02 | <b>3.09</b> | 3.52 | 3.71   | 3.25      | 3.41   | 4.09   | <b>2.91</b> |
| DPA-Ph-SO <sub>2</sub>                         | 2.47 | 2.72  | 2.83  | 2.78 | <b>2.82</b> | 3.09 | 3.26   | 2.91      | 3.04   | 3.54   | <b>2.76</b> |
| <b>Energy Gap (<math>\Delta E_{ST}</math>)</b> |      |       |       |      |             |      |        |           |        |        |             |
| PXZ-Ph-SO <sub>2</sub>                         | 0.01 | 0.01  | 0.01  | 0.02 | <b>0.01</b> | 0.08 | 0.13   | 0.67      | 0.68   | 0.52   | <b>0.08</b> |
| PTZ-Ph-SO <sub>2</sub>                         | 0.01 | 0.01  | 0.02  | 0.09 | <b>0.11</b> | 0.25 | 0.28   | 0.80      | 0.78   | 0.47   | <b>0.41</b> |
| DMAC-Ph-SO <sub>2</sub>                        | 0.01 | 0.01  | 0.01  | 0.02 | <b>0.01</b> | 0.02 | 0.01   | 0.59      | 0.57   | 0.27   | <b>0.09</b> |
| DPA-Ph-SO <sub>2</sub>                         | 0.26 | 0.40  | 0.59  | 0.67 | <b>0.63</b> | 0.67 | 0.68   | 1.08      | 0.93   | 0.69   | <b>0.54</b> |

**Table S4.** Calculated bond Lengths (Å), bond angle (°), and dihedral Angles (°), between the donor and the acceptor at optimized S<sub>0</sub> states at B3LYP/6-31+G\* level of theory.

| Molecules                | d <sub>1</sub> | d <sub>1</sub> ' | d <sub>2</sub> | d <sub>3</sub> | d <sub>4</sub> | d <sub>5</sub> | θ      | δ      | δ'     |
|--------------------------|----------------|------------------|----------------|----------------|----------------|----------------|--------|--------|--------|
| PXZ-Ph-SO                | 1.52           |                  | 1.84           | 1.83           | 1.43           | 1.43           | 97.78  | 85.63  | 98.43  |
| PXZ-3Py-SO               | 1.52           |                  | 1.83           | 1.82           | 1.41           | 1.40           | 98.64  | 32.37  | 29.87  |
| PXZ-2Py-SO               | 1.52           |                  | 1.84           | 1.85           | 1.43           | 1.43           | 95.53  | -97.11 | 84.71  |
| PXZ-Ph-SO <sub>2</sub>   | 1.47           | 1.47             | 1.81           | 1.81           | 1.43           | 1.43           | 104.83 | -86.28 | 93.02  |
| PXZ-3Py-SO <sub>2</sub>  | 1.48           | 1.47             | 1.79           | 1.79           | 1.40           | 1.40           | 105.76 | 27.67  | 27.64  |
| PXZ-2Py-SO <sub>2</sub>  | 1.47           | 1.47             | 1.83           | 1.83           | 1.43           | 1.43           | 102.97 | -97.57 | 82.69  |
| PTZ-Ph-SO                | 1.52           |                  | 1.84           | 1.84           | 1.44           | 1.44           | 98.05  | -97.10 | 97.09  |
| PTZ-3Py-SO               | 1.52           |                  | 1.83           | 1.84           | 1.43           | 1.43           | 97.71  | -20.20 | 20.25  |
| PTZ-2Py-SO               | 1.52           |                  | 1.85           | 1.85           | 1.43           | 1.43           | 96.91  | -83.29 | 83.27  |
| PTZ-Ph-SO <sub>2</sub>   | 1.47           | 1.47             | 1.81           | 1.81           | 1.44           | 1.44           | 104.99 | -82.47 | 82.46  |
| PTZ-3Py-SO <sub>2</sub>  | 1.79           | 1.79             | 1.79           | 1.79           | 1.40           | 1.40           | 105.81 | -17.49 | 17.49  |
| PTZ-2Py-SO <sub>2</sub>  | 1.47           | 1.48             | 1.83           | 1.83           | 1.43           | 1.43           | 104.37 | -97.75 | 96.06  |
| DMAC-Ph-SO               | 1.52           |                  | 1.84           | 1.83           | 1.44           | 1.44           | 97.84  | 81.43  | 100.09 |
| DMAC-3Py-SO              | 1.52           |                  | 1.83           | 1.84           | 1.43           | 1.43           | 97.75  | -93.17 | 86.89  |
| DMAC-2Py-SO              | 1.52           |                  | 1.84           | 1.85           | 1.43           | 1.43           | 95.90  | -79.79 | 101.12 |
| DMAC-Ph-SO <sub>2</sub>  | 1.47           | 1.47             | 1.81           | 1.81           | 1.43           | 1.43           | 104.98 | -80.96 | 80.96  |
| DMAC-3Py-SO <sub>2</sub> | 1.47           | 1.47             | 1.80           | 1.80           | 1.43           | 1.43           | 105.00 | -89.01 | 88.69  |
| DMAC 2Py-SO <sub>2</sub> | 1.47           | 1.48             | 1.83           | 1.83           | 1.43           | 1.43           | 104.42 | -81.51 | 80.77  |
| DPA-Ph-SO                | 1.52           |                  | 1.83           | 1.83           | 1.42           | 1.42           | 98.77  | 37.92  | -37.32 |
| DPA-3Py-SO               | 1.52           |                  | 1.82           | 1.81           | 1.40           | 1.40           | 98.52  | 22.27  | 20.74  |
| DPA-2Py-SO               | 1.52           |                  | 1.83           | 1.84           | 1.41           | 1.41           | 96.79  | -38.72 | 34.11  |
| DPA-Ph-SO <sub>2</sub>   | 1.48           | 1.48             | 1.80           | 1.80           | 1.41           | 1.41           | 105.65 | -33.72 | 33.72  |
| DPA-3Py-SO <sub>2</sub>  | 1.48           | 1.47             | 1.79           | 1.79           | 1.39           | 1.39           | 105.91 | 18.94  | 19.23  |
| DPA-2Py-SO <sub>2</sub>  | 1.47           | 1.48             | 1.82           | 1.82           | 1.40           | 1.40           | 105.30 | 33.67  | 33.21  |

**Table S5.** The calculated HOMO and LUMO molecular orbital contribution (%) of PXZ, PTZ, DMAC, and DPA substituted molecules at M06/6-31+G\* level of theory.

| MOLECULES               | ORBITAL | DONOR (CORE-I) | ACCEPTOR (CORE-II) | DONOR (CORE-III) |
|-------------------------|---------|----------------|--------------------|------------------|
| PXZ-Ph-SO               | HOMO    | 88.58          | -                  | 8.14             |
|                         | LUMO    | -              | 94.40              | 2.42             |
| PXZ-3Py-SO              | HOMO    | 62.51          | 24.65              | 12.85            |
|                         | LUMO    | -              | 88.53              | 10.15            |
| PXZ-2Py-SO              | HOMO    | -              | -                  | 96.31            |
|                         | LUMO    | -              | 94.77              | 0.19             |
| PXZ-Ph-SO <sub>2</sub>  | HOMO    | 59.97          | -                  | 36.80            |
|                         | LUMO    | -              | 94.78              | 2.61             |
| PXZ-3Py-SO <sub>2</sub> | HOMO    | 44.71          | 25.07              | 30.23            |
|                         | LUMO    | 10.37          | 78.47              | 11.16            |
| PXZ-2Py-SO <sub>2</sub> | HOMO    | 49.83          | -                  | 46.57            |
|                         | LUMO    | -              | 94.81              | 2.60             |
| PTZ-Ph-SO               | HOMO    | 48.76          | -                  | 48.63            |
|                         | LUMO    | 3.90           | 92.20              | 3.90             |
| PTZ-3Py-SO              | HOMO    | 10.10          | 20.85              | 69.06            |
|                         | LUMO    | 81.39          | -                  | 15.88            |
| PTZ-2Py-SO              | HOMO    | 48.88          | -                  | 48.84            |
|                         | LUMO    | 46.27          | -                  | 46.31            |
| PTZ-Ph-SO <sub>2</sub>  | HOMO    | -              | 89.12              | -                |
|                         | LUMO    | 47.88          | -                  | 48.02            |
| PTZ-3Py-SO <sub>2</sub> | HOMO    | 28.51          | 42.97              | 28.51            |
|                         | LUMO    | 46.77          | -                  | 46.52            |
| PTZ-2Py-SO <sub>2</sub> | HOMO    | -              | 94.28              | -                |
|                         | LUMO    | -              | -                  | 97.01            |
| DMAC-Ph-SO              | HOMO    | 95.76          | -                  | -                |
|                         | LUMO    | -              | 94.17              | -                |
| DMAC-3Py-SO             | HOMO    | -              | -                  | 95.39            |
|                         | LUMO    | -              | 94.38              | -                |

|                         |      |        |       |       |
|-------------------------|------|--------|-------|-------|
| DMAC-2Py-SO             | HOMO | 95.33  | -     | -     |
|                         | LUMO | -      | 95.50 | -     |
| DPA-Ph-SO               | HOMO | 43.743 | -     | 27.22 |
|                         | LUMO | 10     | 78    | -     |
| DPA-3Py-SO              | HOMO | -      | 34.00 | 62.00 |
|                         | LUMO | 22.76  | 73.12 | -     |
| DPA-2Py-SO              | HOMO | -      | 26.49 | 70.65 |
|                         | LUMO | 38.42  | 60.77 | -     |
| DPA-Ph-SO <sub>2</sub>  | HOMO | 46.81  | 31.38 | 21.81 |
|                         | LUMO | 12.92  | 77.75 | -     |
| DPA-3Py-SO <sub>2</sub> | HOMO | -      | -     | 96.51 |
|                         | LUMO | -      | 95.29 | -     |
| DPA-2Py-SO <sub>2</sub> | HOMO | 36.29  | 29.43 | 34.28 |
|                         | LUMO | -      | 80.02 | 10.19 |

**Table S6.** Calculated the vertical singlet ( $S_1$ ) and triplet ( $T_1$ ) energies, singlet-triplet energy differences ( $\Delta E_{ST}$ ) at B3LYP, PBE0, and M06/6-31+G\* level of theory.

| Molecules               | B3LYP |       |                 | PBE0  |       |                 | M06   |       |                 |
|-------------------------|-------|-------|-----------------|-------|-------|-----------------|-------|-------|-----------------|
|                         | $S_1$ | $T_1$ | $\Delta E_{ST}$ | $S_1$ | $T_1$ | $\Delta E_{ST}$ | $S_1$ | $T_1$ | $\Delta E_{ST}$ |
| PXZ-Ph-SO               | 2.84  | 2.80  | 0.04            | 3.01  | 2.76  | 0.25            | 3.05  | 2.78  | 0.27            |
| PXZ-3Py-SO              | 3.62  | 3.10  | 0.52            | 3.76  | 3.08  | 0.68            | 3.73  | 3.10  | 0.63            |
| PXZ-2Py-SO              | 2.51  | 2.48  | 0.03            | 2.68  | 2.63  | 0.05            | 2.72  | 2.68  | 0.04            |
| PXZ-Ph-SO <sub>2</sub>  | 2.50  | 2.49  | 0.01            | 2.61  | 2.59  | 0.02            | 2.75  | 2.74  | 0.01            |
| PXZ-3Py-SO <sub>2</sub> | 3.47  | 2.98  | 0.49            | 3.68  | 3.00  | 0.67            | 3.62  | 3.05  | 0.57            |
| PXZ-2Py-SO <sub>2</sub> | 2.43  | 2.41  | 0.02            | 2.60  | 2.56  | 0.04            | 2.65  | 2.62  | 0.03            |
| PTZ-Ph-SO               | 3.15  | 2.96  | 0.19            | 3.32  | 2.93  | 0.39            | 3.20  | 2.94  | 0.20            |
| PTZ-3Py-SO              | 3.79  | 3.15  | 0.64            | 3.67  | 3.07  | 0.60            | 3.84  | 3.24  | 0.60            |
| PTZ-2Py-SO              | 2.97  | 2.94  | 0.02            | 3.15  | 2.95  | 0.21            | 3.17  | 2.94  | 0.23            |
| PTZ-Ph-SO <sub>2</sub>  | 2.79  | 2.76  | 0.02            | 2.97  | 2.88  | 0.09            | 3.00  | 2.89  | 0.11            |

|                          |      |      |      |      |      |      |      |      |      |
|--------------------------|------|------|------|------|------|------|------|------|------|
| PTZ-3Py-SO <sub>2</sub>  | 3.67 | 3.13 | 0.55 | 3.82 | 3.11 | 0.71 | 3.79 | 3.15 | 0.64 |
| PTZ-2Py-SO <sub>2</sub>  | 2.68 | 2.66 | 0.02 | 2.87 | 2.83 | 0.04 | 2.89 | 2.86 | 0.03 |
| DMAC-Ph-SO               | 3.22 | 3.20 | 0.02 | 3.38 | 3.24 | 0.14 | 3.41 | 3.23 | 0.18 |
| DMAC-3Py-SO              | 2.67 | 2.65 | 0.03 | 2.92 | 2.81 | 0.11 | 2.88 | 2.86 | 0.02 |
| DMAC-2Py-SO              | 2.90 | 2.87 | 0.03 | 3.06 | 3.02 | 0.05 | 3.10 | 3.07 | 0.03 |
| DMAC-Ph-SO <sub>2</sub>  | 2.87 | 2.86 | 0.01 | 3.04 | 3.02 | 0.02 | 3.10 | 3.09 | 0.01 |
| DMAC-3Py-SO <sub>2</sub> | 2.34 | 2.33 | 0.01 | 3.32 | 2.93 | 0.39 | 2.59 | 2.58 | 0.01 |
| DMAC 2Py-SO <sub>2</sub> | 2.73 | 2.71 | 0.02 | 3.00 | 2.98 | 0.02 | 2.95 | 2.94 | 0.01 |
| DPA-Ph-SO                | 3.55 | 2.94 | 0.61 | 3.62 | 2.89 | 0.73 | 3.58 | 2.91 | 0.67 |
| DPA-3Py-SO               | 3.66 | 3.04 | 0.62 | 3.74 | 3.00 | 0.74 | 3.71 | 3.04 | 0.67 |
| DPA-2Py-SO               | 3.46 | 2.85 | 0.61 | 3.47 | 2.81 | 0.66 | 3.47 | 2.81 | 0.66 |
| DPA-Ph-SO <sub>2</sub>   | 3.32 | 2.79 | 0.53 | 3.55 | 2.80 | 0.75 | 3.44 | 2.82 | 0.62 |
| DPA-3Py-SO <sub>2</sub>  | 3.48 | 2.93 | 0.55 | 3.90 | 3.35 | 0.54 | 3.61 | 2.99 | 0.62 |
| DPA-2Py-SO <sub>2</sub>  | 3.25 | 2.73 | 0.52 | 3.52 | 2.79 | 0.73 | 3.37 | 2.76 | 0.61 |

**Table S7.** Calculated the  $\Delta E_{ST}$  (in eV), oscillator strength (f), transition dipole moment ( $\mu$  in debye), mean separation distance ( $\Delta r$  in Å), overlap extent (I in %) for vertical singlet ( $S_1$ ) and triplet ( $T_1$ ) energies at the M06/6-31+G\* level of theory.

| Molecules               | $\Delta E_{ST}$ | f     | $\mu$ | $\Delta r$ |       | I     |       |
|-------------------------|-----------------|-------|-------|------------|-------|-------|-------|
|                         |                 |       |       | $S_1$      | $T_1$ | $S_1$ | $T_1$ |
| PXZ-Ph-SO               | 0.04            | 0.003 | 0.52  | 5.86       | 5.53  | 14.56 | 43.30 |
| PXZ-3Py-SO              | 0.52            | 0.763 | 7.36  | 3.01       | 2.92  | 53.66 | 56.21 |
| PXZ-2Py-SO              | 0.03            | 0.001 | 0.25  | 4.38       | 4.42  | 19.64 | 21.39 |
| PXZ-Ph-SO <sub>2</sub>  | 0.01            | 0.002 | 0.47  | 2.95       | 2.95  | 16.21 | 16.22 |
| PXZ-3Py-SO <sub>2</sub> | 0.49            | 0.809 | 7.70  | 1.79       | 1.81  | 57.59 | 56.94 |
| PXZ-2Py-SO <sub>2</sub> | 0.02            | 0.001 | 0.15  | 2.60       | 2.60  | 19.15 | 19.24 |
| PTZ-Ph-SO               | 0.19            | 0.000 | 0.03  | 2.60       | 1.50  | 22.72 | 42.85 |
| PTZ-3Py-SO              | 0.64            | 0.760 | 0.55  | 2.50       | 1.00  | 50.00 | 50.00 |
| PTZ-2Py-SO              | 0.02            | 0.000 | 0.12  | 2.70       | 1.00  | 17.24 | 52.00 |



|                          |      |       |      |      |      |       |       |
|--------------------------|------|-------|------|------|------|-------|-------|
| PTZ-Ph-SO <sub>2</sub>   | 0.02 | 0.001 | 0.27 | 2.72 | 2.04 | 18.03 | 33.35 |
| PTZ-3Py-SO <sub>2</sub>  | 0.55 | 0.890 | 7.89 | 1.06 | 1.12 | 57.03 | 56.70 |
| PTZ-2Py-SO <sub>2</sub>  | 0.02 | 0.000 | 0.11 | 6.28 | 5.95 | 13.84 | 17.01 |
| DMAC-Ph-SO               | 0.02 | 0.000 | 0.16 | 5.57 | 4.55 | 15.46 | 40.00 |
| DMAC-3Py-SO              | 0.03 | 0.004 | 0.64 | 5.26 | 5.28 | 16.92 | 16.90 |
| DMAC-2Py-SO              | 0.03 | 0.001 | 0.22 | 4.21 | 4.21 | 19.38 | 19.38 |
| DMAC-Ph-SO <sub>2</sub>  | 0.01 | 0.001 | 0.24 | 4.00 | 4.50 | 15.00 | 16.00 |
| DMAC-3Py-SO <sub>2</sub> | 0.01 | 0.000 | 0.07 | 2.49 | 2.50 | 17.14 | 17.10 |
| DMAC 2Py-SO <sub>2</sub> | 0.02 | 0.000 | 0.07 | 6.00 | 6.00 | 14.61 | 14.62 |
| DPA-Ph-SO                | 0.61 | 0.657 | 6.97 | 1.09 | 1.13 | 52.60 | 53.76 |
| DPA-3Py-SO               | 0.62 | 0.587 | 6.48 | 3.77 | 2.57 | 53.07 | 60.27 |
| DPA-2Py-SO               | 0.61 | 0.382 | 5.40 | 1.95 | 1.28 | 44.30 | 14.62 |
| DPA-Ph-SO <sub>2</sub>   | 0.53 | 0.750 | 7.60 | 1.22 | 1.19 | 62.13 | 63.01 |
| DPA-3Py-SO <sub>2</sub>  | 0.55 | 0.850 | 7.90 | 1.24 | 1.21 | 62.56 | 61.90 |
| DPA-2Py-SO <sub>2</sub>  | 0.52 | 0.637 | 7.08 | 1.53 | 1.49 | 60.88 | 60.74 |

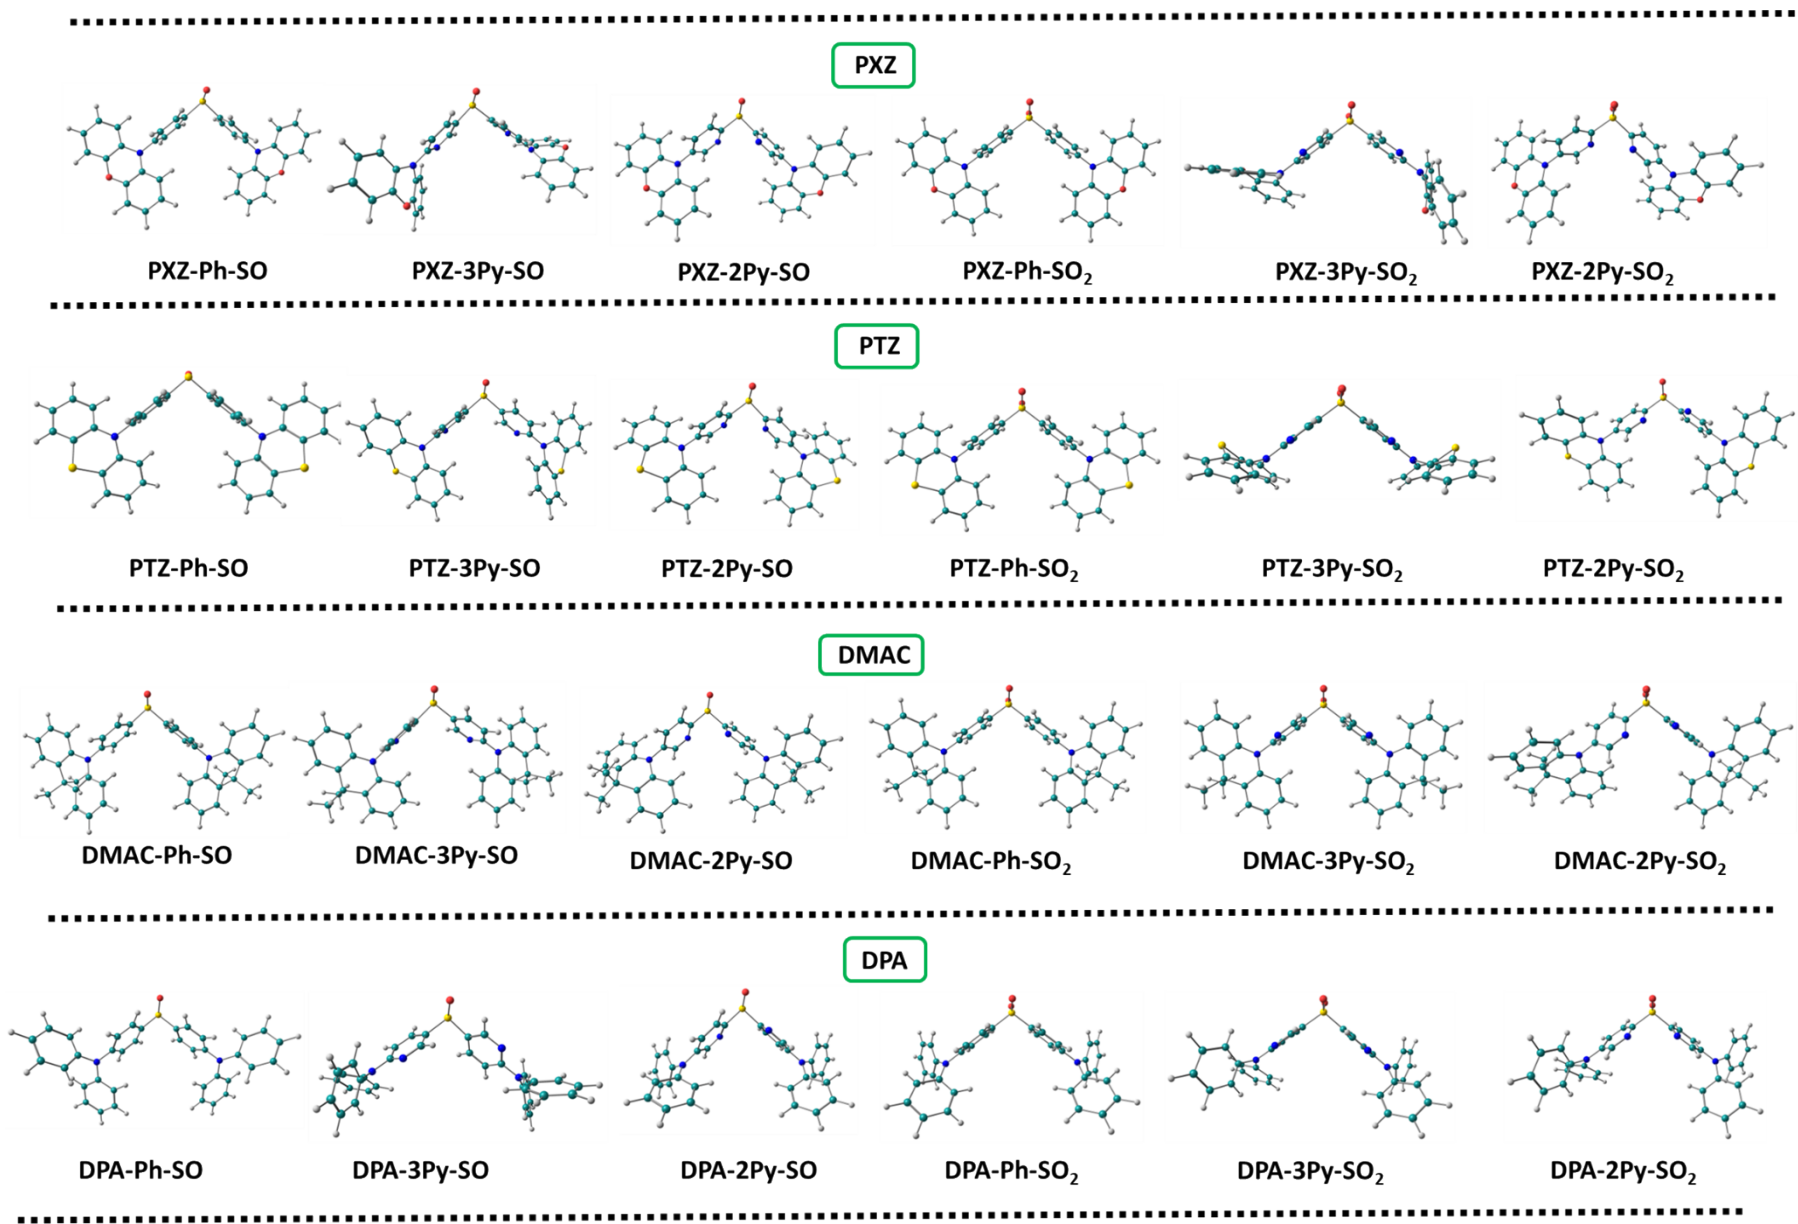

**Figure S1.** Optimized geometries of designed molecules using B3LYP/6-31+G\* level of theory.

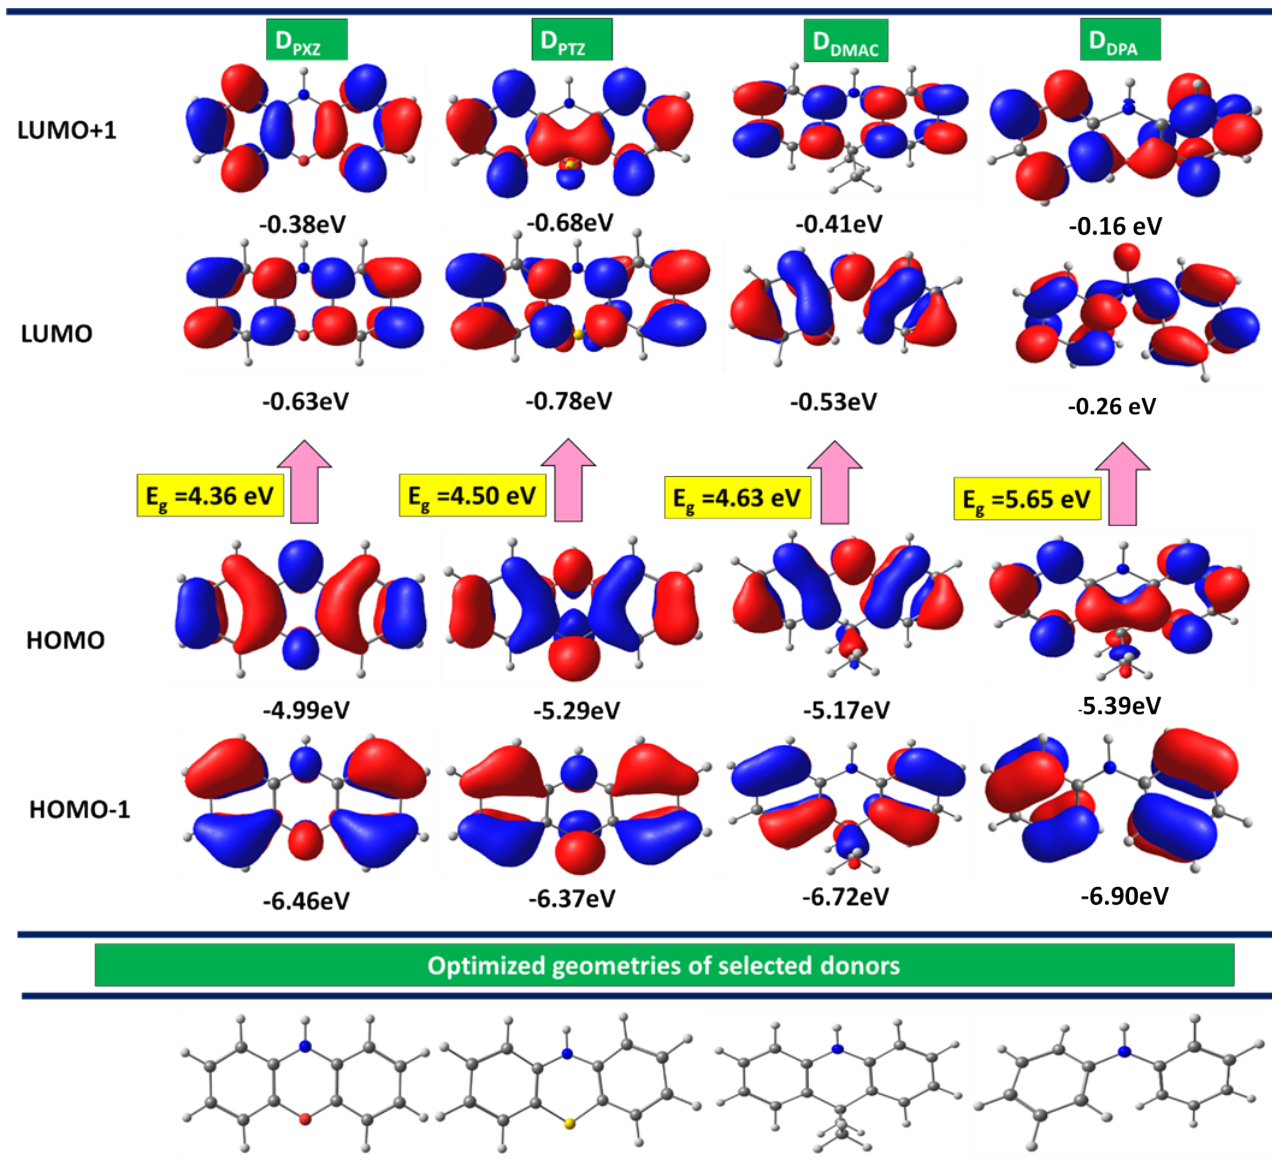

**Figure S2.** Frontier molecular orbital (FMOs) and optimized geometries of selected donors (iso-surface value = 0.02 au) using B3LYP/6-31+G\* level of theory.

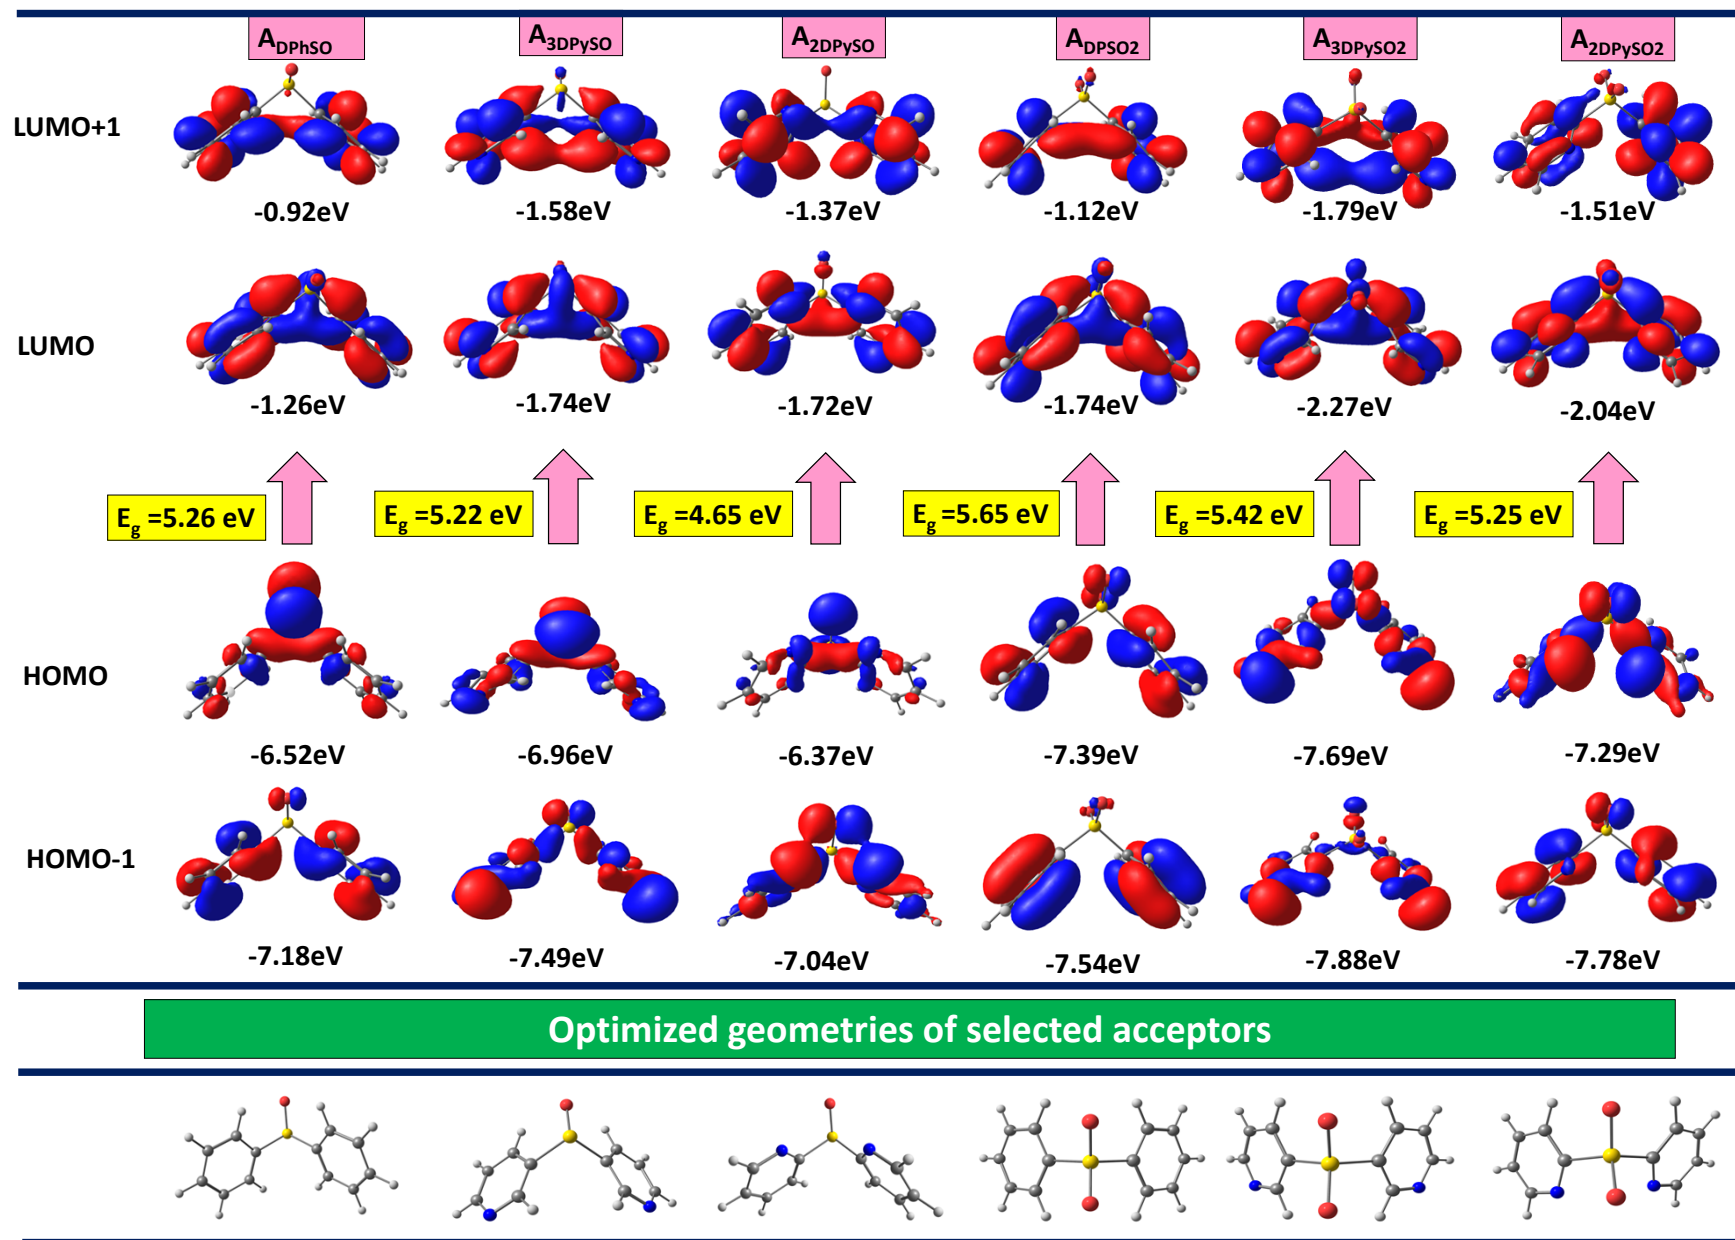

**Figure S3.** Frontier molecular orbital (FMOs) and optimized geometries of selected acceptors (iso-surface value = 0.02 au) using B3LYP/6-31+G\* level of theory.

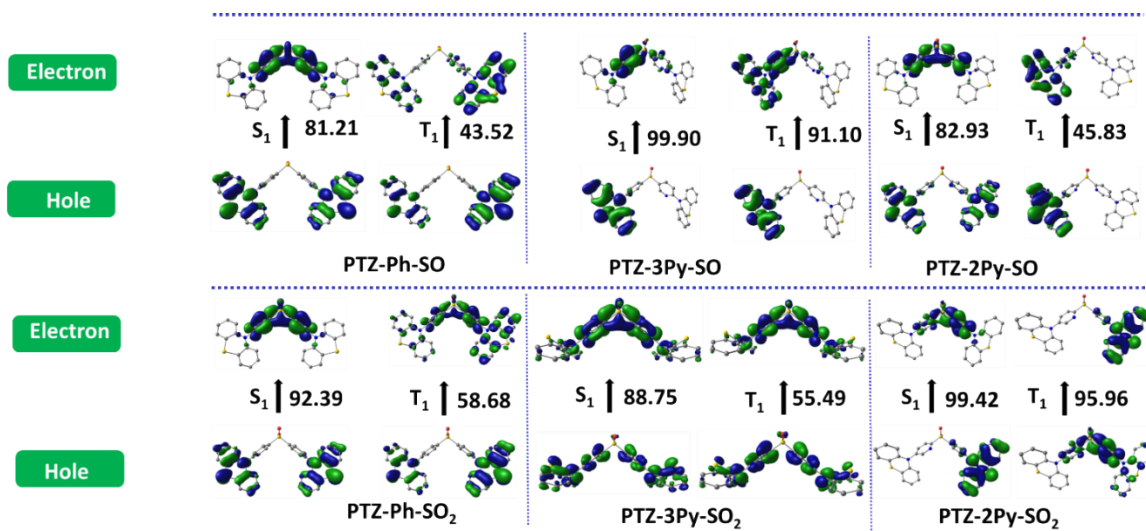

**Figure S4.** Natural transition orbitals (NTOs) of the  $S_1$  and  $T_1$  state for PTZ substituted molecules (iso-surface value = 0.02 au) at M06/6-31+G\* level of theory. Hydrogen atoms are omitted for clarity.

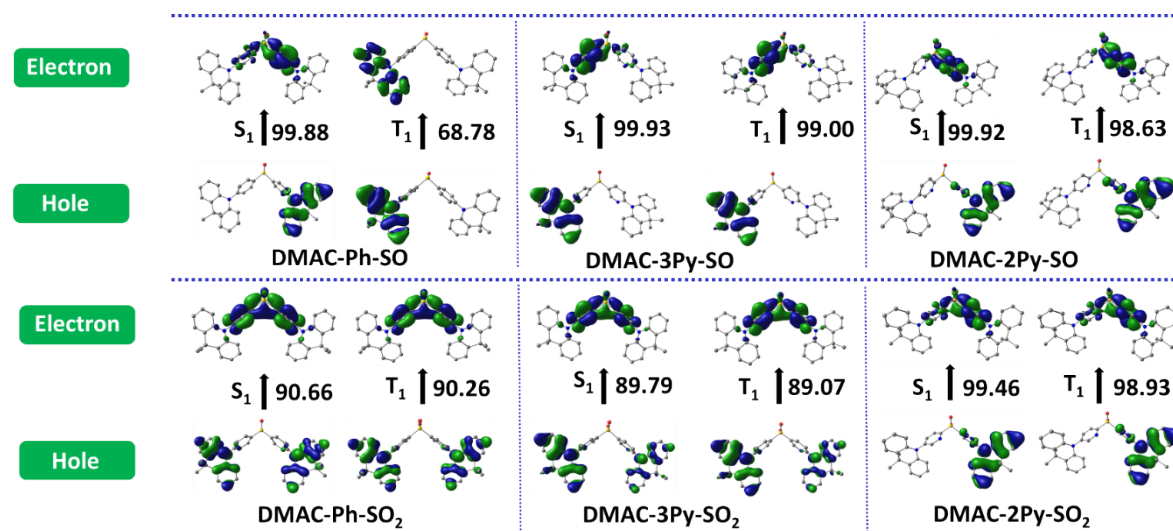

**Figure S5.** Natural transition orbitals (NTOs) of the  $S_1$  and  $T_1$  state for DMAC substituted molecules (iso-surface value = 0.02 au) at M06/6-31+G\* level of theory. Hydrogen atoms are omitted for clarity.

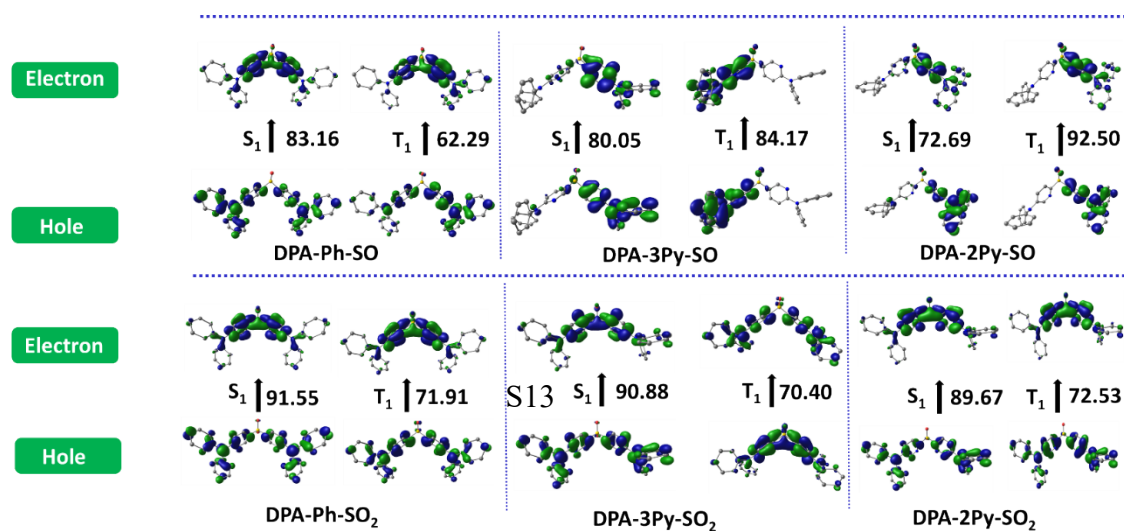

**Figure S6.** Natural transition orbitals (NTOs) of the  $S_1$  and  $T_1$  state for DPA substituted molecules (iso-surface value = 0.02 au) at M06/6-31+G\* level of theory. Hydrogen atoms are omitted for clarity.

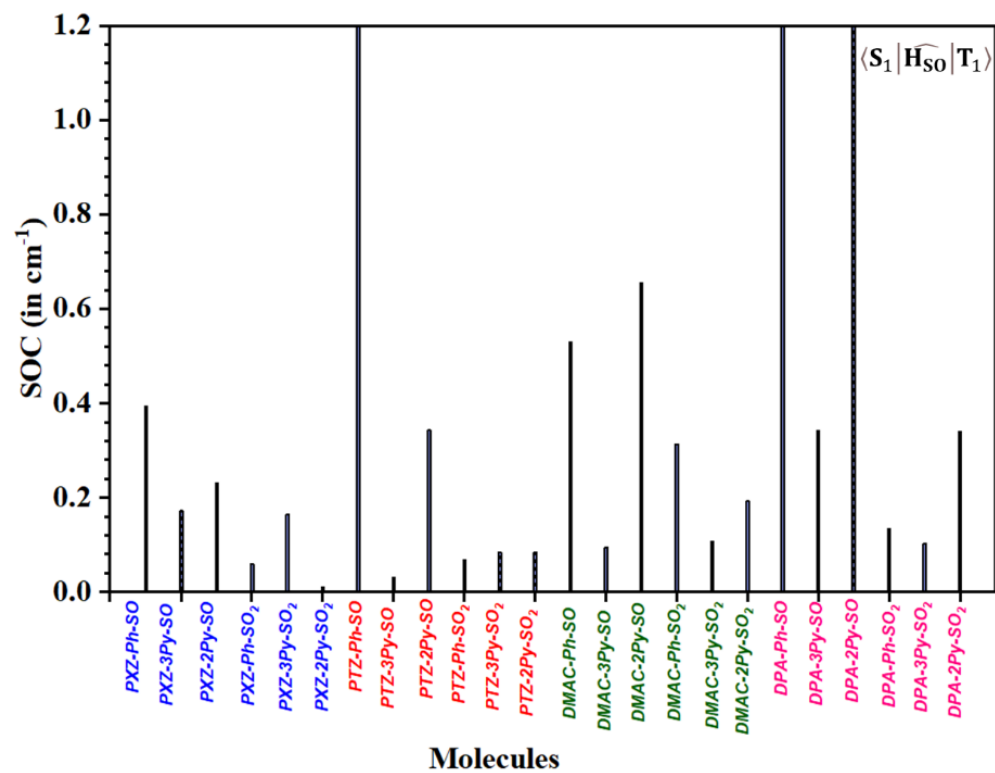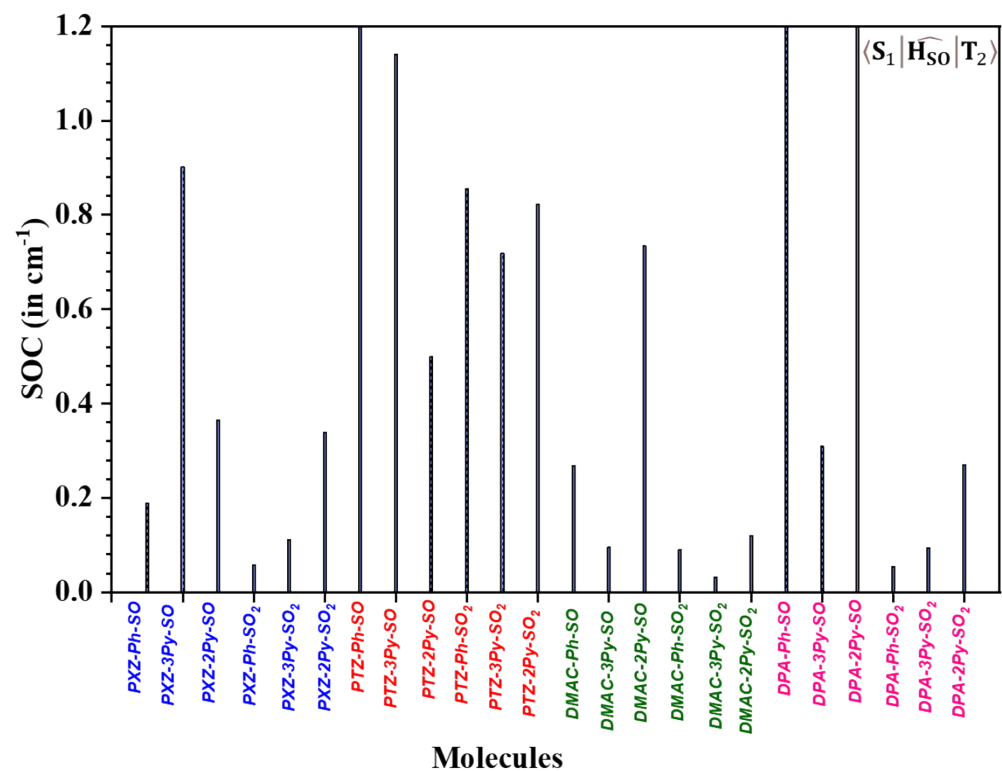

Figure S7. Spin-orbit coupling values (in cm<sup>-1</sup>) between Singlet and triplet states of T<sub>1</sub> geometry calculated at the M06/ def2-SVP level of theory.

## Spin-orbit coupling (SOC) calculations

The calculations for the spin-orbit coupling (SOC) were performed utilizing the ORCA 4.0 package. The SOC values were determined for T<sub>1</sub> geometries using the M06/def2-SVP level of theory. The equation is,

$$\text{SOC} = \sqrt{(\langle S_n | \hat{H}_{\text{SOC}}^x | T_n \rangle^2 + \langle S_n | \hat{H}_{\text{SOC}}^y | T_n \rangle^2 + \langle S_n | \hat{H}_{\text{SOC}}^z | T_n \rangle^2) / 3}$$

For instance, we provided the calculated SOC values for molecules **PXZ-Ph-SO** and **PXZ-3Py-SO**, specifically between the S<sub>1</sub> and T<sub>1</sub> states, using the optimized T<sub>1</sub> geometry.

| Molecules         | SOCx | SOCy | SOCz | x <sup>2</sup> | y <sup>2</sup> | z <sup>2</sup> | x <sup>2</sup> + y <sup>2</sup> + z <sup>2</sup> | (x <sup>2</sup> + y <sup>2</sup> + z <sup>2</sup> )/3 | SQRT ((x <sup>2</sup> + y <sup>2</sup> + z <sup>2</sup> )/3) |
|-------------------|------|------|------|----------------|----------------|----------------|--------------------------------------------------|-------------------------------------------------------|--------------------------------------------------------------|
| <b>PXZ-Ph-SO</b>  | 0.27 | 0.46 | 0.42 | 0.0729         | 0.2116         | 0.1764         | 0.4609                                           | 0.1536                                                | 0.39                                                         |
| <b>PXZ-3Py-SO</b> | 0.23 | 0.11 | 0.15 | 0.0529         | 0.0121         | 0.0225         | 0.0875                                           | 0.0291                                                | 0.17                                                         |

## ISC and RISC rate calculations

The intersystem crossing (ISC) and reverse intersystem crossing rates (RISC) were calculated by using semiclassical Marcus's equation,

$$k = \frac{2\pi}{\hbar} |V|^2 \frac{1}{\sqrt{4\pi k_B T \lambda}} \exp\left(-\frac{(\lambda + \Delta E_{ST})^2}{4\lambda k_B T}\right)$$

|           |   |                            |
|-----------|---|----------------------------|
| $\hbar$   | - | Reduced Planck's constant. |
| $K_B$     | - | Boltzmann constant.        |
| $V$       | - | Spin-orbit coupling        |
| $T$       | - | Temperature.               |
| $\lambda$ | - | Reorganization energy.     |

The energy difference  $\Delta E_{ST}$  (M06 functional) represents the variance between the relevant excited states, with opposite signs for intersystem crossing (ISC) and reverse intersystem crossing (RISC). For our rate computations, we incorporated the spin-orbit coupling (SOC) values derived from the optimized geometry of the T<sub>1</sub> state.



The total reorganization energy comprises both the intramolecular reorganization energy and the contribution of reorganization energy from the surrounding environment. As a result, we accounted for total reorganization energies of 0.20 eV when calculating the ISC and RISC rates. This value represents the combined effects of medium-induced relaxations, a topic that has been thoroughly discussed in prior studies.

$$\lambda \text{ (total)} = \lambda \text{ (surroundings)} + \lambda \text{ (intramolecular)}$$

$$\lambda \text{ (intramolecular)} = E_{S_1}^* \text{ (T}_1\text{-geometry)} - E_{S_1} \text{ (S}_1\text{-geometry)}$$

Where  $E_{S_1}^*$  represents the energy of the  $S_1$  state at the  $T_1$ -state geometry, and  $E_{S_1}$  represents the energy at the  $S_1$ -state geometry. Here, we outline the calculations for the ISC and RISC rates for molecule (PXZ-Ph-SO) transition between the  $S_1$  and  $T_1$  states. The spin-orbit coupling (SOC) value between these states for molecule (PXZ-Ph-SO) is determined to be 0.000048354eV, while the reorganization energy ( $\lambda$ ) is fixed at 0.20 eV.

**Table S8.** Calculated intramolecular reorganization energies for reference molecules at M06/6-31G\* level of theory.

| Molecules               | $E_{S_1}$<br>( $S_1$ geometry) | $E_{S_1}^*$<br>( $T_1$ geometry) | $\lambda$ (in Hartree) | $\lambda$ (in eV) |
|-------------------------|--------------------------------|----------------------------------|------------------------|-------------------|
|                         |                                |                                  | $S_1$ - $T_1$          | $S_1$ - $T_1$     |
| PXZ-Ph-SO <sub>2</sub>  | -2193.44915                    | -2193.44371                      | 0.00544                | 0.15              |
| PTZ-Ph-SO <sub>2</sub>  | -2839.38947                    | -2839.38258                      | 0.00689                | 0.19              |
| DMAC-Ph-SO <sub>2</sub> | -2278.76428                    | -2278.75914                      | 0.00514                | 0.14              |
| DPA-Ph-SO <sub>2</sub>  | -2045.43937                    | -2045.43254                      | 0.00683                | 0.19              |

For ISC:

$$\frac{2\pi}{\hbar} \frac{1}{|H|^2 \sqrt{4\pi k_B T \lambda}} = 8.76 \times 10^{07} \text{ eV s}^{-1}$$

$$\exp\left(-\frac{(\lambda + \Delta E_{ST})^2}{4\lambda k_B T}\right) = 2.23766 \times 10^{-05} \text{ eV}^{-1}$$

$$k \text{ (ISC)} = 6.91 \times 10^{07} \text{ s}^{-1}$$

**For RISC:**

$$\frac{2\pi}{\hbar} |V|^2 \frac{1}{\sqrt{4\pi k_B T \lambda}} = 8.76 * 10^{+07} \text{ eV s}^{-1}$$

$$\exp\left(-\frac{(\lambda + \Delta E_{ST})^2}{4\lambda k_B T}\right) = 2.23766 * 10^{-05} \text{ eV}^{-1}$$

$$k(\text{RISC}) = 2.01 \times 10^{+03} \text{ s}^{-1}$$

The numerical values used in ISC and RISC rate calculation:

|           |   |                                           |
|-----------|---|-------------------------------------------|
| $\pi$     | - | 3.141                                     |
| $V$       | - | SOC values (in eV)                        |
| $\hbar$   | - | $6.5821 \times 10^{-16} \text{ eV s}$     |
| $K_B$     | - | $8.6173 \times 10^{-5} \text{ eV K}^{-1}$ |
| $\lambda$ | - | 0.20 eV                                   |
| $T$       | - | 300 K                                     |

The optimized structure's cartesian coordinates utilizing the B3LYP/6-31+G\* level of theory.  
(All the cartesian coordinates are in Å)

**PXZ-Ph-SO**

| Atoms | x           | y           | z           |
|-------|-------------|-------------|-------------|
| C     | -3.03678700 | -1.06066200 | 1.07372400  |
| C     | -1.95467800 | -1.93912200 | 1.14201200  |
| C     | -1.40010000 | -2.42654000 | -0.04159400 |
| C     | -1.93023000 | -2.08402200 | -1.28640000 |
| C     | -3.01338300 | -1.20352000 | -1.34801900 |
| C     | -3.56437400 | -0.68802400 | -0.16990000 |
| H     | -3.48267100 | -0.66323800 | 1.98139400  |
| H     | -1.54684200 | -2.26100500 | 2.09637400  |
| H     | -1.51806100 | -2.50345800 | -2.20130000 |
| H     | -3.44469900 | -0.92124600 | -2.30418600 |
| S     | -0.01200500 | -3.61957600 | 0.05909900  |
| C     | 1.36499300  | -2.40502200 | -0.00651200 |
| C     | 2.07636900  | -2.16290600 | 1.16745100  |
| C     | 1.73653700  | -1.81350100 | -1.21564000 |
| C     | 3.16313800  | -1.28567000 | 1.13573600  |
| H     | 1.77940900  | -2.66778000 | 2.08264400  |
| C     | 2.82047500  | -0.93414300 | -1.23919800 |
| H     | 1.19353100  | -2.02783200 | -2.13304800 |
| C     | 3.53361100  | -0.66729200 | -0.06414300 |
| H     | 3.73093100  | -1.07989300 | 2.03904300  |
| H     | 3.12602300  | -0.45589700 | -2.16542500 |
| O     | -0.01380800 | -4.16937400 | 1.47359400  |
| C     | 5.95500600  | -0.27610500 | -0.28689600 |
| C     | 4.48680400  | 1.57672900  | 0.28754100  |
| C     | 7.03731700  | 0.62348500  | -0.29454800 |
| C     | 6.22679600  | -1.63704000 | -0.47496500 |
| C     | 5.60622100  | 2.42989900  | 0.26673700  |
| C     | 3.25532600  | 2.11429000  | 0.68267800  |
| C     | 8.34010100  | 0.18146700  | -0.47974500 |
| C     | 7.53886800  | -2.08461700 | -0.67089900 |
| H     | 5.41023500  | -2.35083300 | -0.47306900 |
| C     | 5.50139500  | 3.76478500  | 0.63306200  |
| C     | 3.14505700  | 3.46250100  | 1.04398400  |
| H     | 2.37691600  | 1.47853800  | 0.70400300  |
| C     | 8.59891600  | -1.18067700 | -0.67345800 |
| H     | 9.13888000  | 0.91725300  | -0.47656000 |
| H     | 7.71934700  | -3.14568400 | -0.81862900 |
| H     | 6.39623300  | 4.37930500  | 0.60037000  |
| C     | 4.26430200  | 4.29170500  | 1.02275100  |
| H     | 2.17644200  | 3.85252500  | 1.34411200  |
| H     | 9.61909100  | -1.52143000 | -0.82357200 |

|   |             |             |             |
|---|-------------|-------------|-------------|
| H | 4.18614500  | 5.33782400  | 1.30368100  |
| C | -4.45530700 | 1.60328900  | -0.29617700 |
| C | -5.99001900 | -0.27089600 | -0.04666700 |
| C | -5.56411600 | 2.47035400  | -0.31160100 |
| C | -3.17502600 | 2.16929300  | -0.34437500 |
| C | -7.06042500 | 0.64284600  | -0.06537900 |
| C | -6.28332200 | -1.62632300 | 0.14931100  |
| C | -5.39981100 | 3.84754100  | -0.37216800 |
| C | -3.00689300 | 3.55759100  | -0.41261300 |
| H | -2.30443400 | 1.52256900  | -0.33255600 |
| C | -8.37066200 | 0.22029900  | 0.11344300  |
| C | -7.60437100 | -2.05579600 | 0.32374500  |
| H | -5.47716000 | -2.35172200 | 0.16200600  |
| C | -4.11523000 | 4.40133000  | -0.42668700 |
| H | -6.28859900 | 4.47158500  | -0.38080800 |
| H | -2.00170300 | 3.96773100  | -0.45435400 |
| H | -9.15935800 | 0.96657200  | 0.09146800  |
| C | -8.65149300 | -1.13715600 | 0.30861000  |
| H | -7.80140800 | -3.11386700 | 0.47157300  |
| H | -3.99258300 | 5.47910400  | -0.47893200 |
| H | -9.67849100 | -1.46298400 | 0.44455300  |
| N | 4.64874100  | 0.23005300  | -0.10546400 |
| N | -4.67671400 | 0.20989000  | -0.24343300 |
| O | 6.84772500  | 1.98597700  | -0.15016600 |
| O | -6.86133200 | 1.99305400  | -0.28858900 |

### PXZ-2Py-SO

| Atoms | x           | y           | z           |
|-------|-------------|-------------|-------------|
| C     | -2.67219200 | -0.78696700 | 1.22951500  |
| C     | -1.32525700 | -2.35056300 | 0.00608000  |
| C     | -2.11048400 | -2.08067600 | -1.10885900 |
| C     | -3.38012100 | -0.52961100 | 0.02679100  |
| H     | -2.95298600 | -0.30061700 | 2.15548700  |
| H     | -1.94198300 | -2.60071400 | -2.05141300 |
| S     | -0.00668600 | -3.59521300 | -0.08284100 |
| C     | 1.42944800  | -2.46829200 | -0.16690600 |
| C     | 1.73805200  | -1.74350600 | -1.31424600 |
| C     | 3.41574800  | -1.56874000 | 0.83326900  |
| H     | 1.09789800  | -1.78193400 | -2.19512900 |
| C     | 3.65073100  | -0.86713000 | -0.37226600 |
| H     | 4.08295800  | -1.46329800 | 1.67974900  |
| C     | 5.84195900  | -0.05335900 | 0.41211500  |
| C     | 4.73120100  | 1.16119000  | -1.32909700 |
| C     | 6.25646300  | 1.16220300  | 0.97034400  |
| C     | 6.52597900  | -1.22427300 | 0.75885500  |

|   |             |             |             |
|---|-------------|-------------|-------------|
| C | 5.17235600  | 2.34805800  | -0.72203800 |
| C | 4.31643800  | 1.20668800  | -2.66515700 |
| C | 7.28774700  | 1.21584500  | 1.90518700  |
| C | 7.55304100  | -1.18338600 | 1.70388200  |
| H | 6.23643400  | -2.16451900 | 0.29889300  |
| C | 5.15782400  | 3.56310600  | -1.39908400 |
| C | 4.28973400  | 2.42629800  | -3.34801700 |
| H | 3.99087400  | 0.29571600  | -3.14715900 |
| C | 7.92618800  | 0.03350300  | 2.28510100  |
| H | 7.57420400  | 2.17848800  | 2.31771300  |
| H | 8.06560600  | -2.10084800 | 1.97862900  |
| H | 5.50459000  | 4.45431200  | -0.88483800 |
| C | 4.69816400  | 3.60374400  | -2.71728400 |
| H | 3.94839800  | 2.44944400  | -4.37916300 |
| H | 8.72607300  | 0.06650400  | 3.01941300  |
| H | 4.67587600  | 4.54996400  | -3.25077700 |
| C | -4.65345000 | 1.30879300  | 1.06414600  |
| C | -5.55195700 | 0.26287200  | -0.89526000 |
| C | -5.94744800 | 1.38473500  | 1.59411200  |
| C | -3.66111100 | 2.15167700  | 1.57754600  |
| C | -6.82462600 | 0.36396700  | -0.31125800 |
| C | -5.46222200 | 0.06387800  | -2.27758600 |
| C | -6.24409900 | 2.23023000  | 2.66068800  |
| C | -3.94540000 | 2.99493400  | 2.65352600  |
| H | -2.66649400 | 2.12889700  | 1.14203100  |
| C | -7.98567900 | 0.21886600  | -1.06349800 |
| C | -6.62491500 | -0.09074600 | -3.03794800 |
| H | -4.48720600 | 0.00122700  | -2.73975700 |
| C | -5.23216900 | 3.02541000  | 3.20235100  |
| H | -7.25865300 | 2.25406300  | 3.04662300  |
| H | -3.16368400 | 3.63279400  | 3.05595900  |
| H | -8.94709400 | 0.29903000  | -0.56540500 |
| C | -7.88310900 | -0.02543900 | -2.43460400 |
| H | -6.54053700 | -0.26300400 | -4.10725900 |
| H | -5.45441100 | 3.68181700  | 4.03891600  |
| H | -8.78469000 | -0.14815000 | -3.02831300 |
| N | 4.76641700  | -0.02435700 | -0.52339300 |
| N | -4.42970000 | 0.40048400  | -0.01257400 |
| O | 5.64406500  | 2.33623900  | 0.58272500  |
| O | -6.95606100 | 0.62046100  | 1.04583000  |
| C | -1.63809100 | -1.70488400 | 1.20972600  |
| C | 2.29695400  | -2.38374500 | 0.92484500  |
| N | 2.81901600  | -0.96532900 | -1.42062900 |
| N | -3.10071300 | -1.18081300 | -1.11022300 |
| H | -1.09527200 | -1.95403300 | 2.11776600  |
| H | 2.07724300  | -2.94701700 | 1.82803500  |

|   |            |             |            |
|---|------------|-------------|------------|
| O | 0.08205900 | -4.24953700 | 1.28811400 |
|---|------------|-------------|------------|

**PXZ-3Py-SO**

| Atoms | x           | y           | z           |
|-------|-------------|-------------|-------------|
| C     | -2.42642100 | -0.78573000 | 0.77797500  |
| C     | -1.32118500 | -2.42078200 | -0.35913200 |
| C     | -2.23723100 | -2.41854600 | -1.41107500 |
| C     | -3.30580400 | -1.52319500 | -1.33660500 |
| C     | -3.40703400 | -0.68991000 | -0.21969500 |
| H     | -2.48370000 | -0.14558000 | 1.65595800  |
| H     | -2.11774300 | -3.09023800 | -2.25608500 |
| H     | -4.05248900 | -1.46975900 | -2.12423200 |
| S     | 0.05223300  | -3.66264200 | -0.40826900 |
| C     | 1.40623500  | -2.43744700 | -0.19849800 |
| C     | 2.13941800  | -2.44222400 | 0.98497100  |
| C     | 2.63691500  | -0.77218300 | -1.13877300 |
| C     | 3.18606000  | -1.52524500 | 1.08198000  |
| H     | 1.87782000  | -3.13180000 | 1.78150900  |
| C     | 3.44242400  | -0.67242300 | 0.00241200  |
| H     | 2.81999300  | -0.12192300 | -1.99136500 |
| H     | 3.79836600  | -1.46325600 | 1.97775700  |
| C     | 4.28539100  | 1.54117900  | 0.66122700  |
| C     | 5.82042900  | -0.10486400 | -0.26936100 |
| C     | 5.35816500  | 2.44786800  | 0.74387300  |
| C     | 3.04727700  | 1.93249200  | 1.18552000  |
| C     | 6.85323900  | 0.84464200  | -0.16167900 |
| C     | 6.15189200  | -1.39595600 | -0.69826800 |
| C     | 5.20150800  | 3.69604600  | 1.33125400  |
| C     | 2.88451100  | 3.19386000  | 1.77085400  |
| H     | 2.20338300  | 1.25314300  | 1.13355500  |
| C     | 8.16745700  | 0.51564200  | -0.46506800 |
| C     | 7.47505600  | -1.72805500 | -1.01295900 |
| H     | 5.37421800  | -2.14592100 | -0.79386800 |
| C     | 3.95784600  | 4.07867800  | 1.84718200  |
| H     | 6.06145900  | 4.35811400  | 1.37039400  |
| H     | 1.91145800  | 3.47235700  | 2.16547900  |
| H     | 8.92711500  | 1.28516100  | -0.36441500 |
| C     | 8.48640300  | -0.77703800 | -0.89696600 |
| H     | 7.70220800  | -2.73626800 | -1.34760800 |
| H     | 3.83876700  | 5.05808400  | 2.30097000  |
| H     | 9.51498200  | -1.02823000 | -1.13831100 |
| C     | -4.40940000 | 1.49440600  | -0.73706100 |
| C     | -5.71065200 | -0.17838100 | 0.46741600  |
| C     | -5.51400600 | 2.36249100  | -0.65883700 |
| C     | -3.28323700 | 1.92014100  | -1.45225400 |
| C     | -6.78021100 | 0.73423400  | 0.51436500  |
| C     | -5.91585600 | -1.46527800 | 0.97961200  |

|   |             |             |             |
|---|-------------|-------------|-------------|
| C | -5.49644700 | 3.60544400  | -1.27742000 |
| C | -3.26053300 | 3.17588100  | -2.07091200 |
| H | -2.41553900 | 1.27316300  | -1.52330600 |
| C | -8.00958300 | 0.37383000  | 1.04954500  |
| C | -7.15218100 | -1.82877300 | 1.52665800  |
| H | -5.10666100 | -2.18731700 | 0.96035300  |
| C | -4.36448800 | 4.02146200  | -1.98775000 |
| H | -6.37519200 | 4.23717500  | -1.18757600 |
| H | -2.37161300 | 3.48148200  | -2.61540100 |
| H | -8.80294700 | 1.11530000  | 1.06156900  |
| C | -8.20205700 | -0.91383000 | 1.56317400  |
| H | -7.28102600 | -2.83227000 | 1.92201800  |
| H | -4.35414100 | 4.99654100  | -2.46564900 |
| H | -9.16379200 | -1.18923400 | 1.98565100  |
| N | 4.49763800  | 0.28828800  | 0.04013800  |
| N | -4.47487000 | 0.24515100  | -0.07668800 |
| O | 6.60165700  | 2.15026100  | 0.21763400  |
| O | -6.64862300 | 2.03286300  | 0.05836200  |
| N | 1.62996600  | -1.64805100 | -1.24371000 |
| N | -1.39773000 | -1.63553000 | 0.70990700  |
| O | 0.00333300  | -4.46888500 | 0.87440000  |

### PXZ-Ph-SO<sub>2</sub>

| Atoms | x           | y           | z           |
|-------|-------------|-------------|-------------|
| C     | -3.13487100 | -0.98313400 | 1.13420600  |
| C     | -2.02511300 | -1.82795500 | 1.16738900  |
| C     | -1.43182500 | -2.21632000 | -0.03655700 |
| C     | -1.93095900 | -1.78575500 | -1.26768300 |
| C     | -3.03967100 | -0.93781900 | -1.29050800 |
| C     | -3.63962700 | -0.53305800 | -0.09275400 |
| H     | -3.61905100 | -0.67401200 | 2.05614000  |
| H     | -1.63832400 | -2.20281700 | 2.10962400  |
| H     | -1.47230300 | -2.12622500 | -2.19052400 |
| H     | -3.45152900 | -0.59107300 | -2.23373800 |
| S     | 0.00002000  | -3.31873100 | 0.00032400  |
| C     | 1.43187100  | -2.21633100 | 0.03705700  |
| C     | 1.93106000  | -1.78566600 | 1.26812700  |
| C     | 2.02511800  | -1.82806600 | -1.16694300 |
| C     | 3.03977700  | -0.93773800 | 1.29084000  |
| H     | 1.47243200  | -2.12606100 | 2.19101000  |
| C     | 3.13487000  | -0.98323500 | -1.13387100 |
| H     | 1.63831200  | -2.20300700 | -2.10913900 |
| C     | 3.63967600  | -0.53305400 | 0.09303100  |
| H     | 3.45168900  | -0.59093500 | 2.23402800  |
| H     | 3.61900400  | -0.67418300 | -2.05585300 |
| O     | -0.03419900 | -4.03403800 | 1.28768500  |

|   |             |             |             |
|---|-------------|-------------|-------------|
| O | 0.03423200  | -4.03421600 | -1.28693300 |
| C | 6.08067600  | -0.22258900 | 0.12682000  |
| C | 4.62472200  | 1.71486400  | -0.10621000 |
| C | 7.18762700  | 0.64576000  | 0.10812800  |
| C | 6.32278700  | -1.60158700 | 0.15311900  |
| C | 5.76960900  | 2.53354500  | -0.12118800 |
| C | 3.37798500  | 2.32030100  | -0.30758300 |
| C | 8.48660700  | 0.15618900  | 0.11406600  |
| C | 7.63184200  | -2.09785400 | 0.16798400  |
| H | 5.48723600  | -2.29298000 | 0.16792600  |
| C | 5.67335600  | 3.90137500  | -0.33840900 |
| C | 3.27754900  | 3.70084200  | -0.51814800 |
| H | 2.47958200  | 1.71280200  | -0.29354500 |
| C | 8.71675200  | -1.22416300 | 0.14808500  |
| H | 9.30566000  | 0.86913500  | 0.09846100  |
| H | 7.78980200  | -3.17229900 | 0.19374200  |
| H | 6.58767100  | 4.48737000  | -0.34153400 |
| C | 4.42151500  | 4.49558000  | -0.53673000 |
| H | 2.29687900  | 4.14358700  | -0.66844100 |
| H | 9.73458900  | -1.60260300 | 0.15853400  |
| H | 4.35114700  | 5.56671600  | -0.70116600 |
| C | -4.62477400 | 1.71484100  | 0.10642200  |
| C | -6.08062500 | -0.22262800 | -0.12719200 |
| C | -5.76967700 | 2.53350500  | 0.12108500  |
| C | -3.37809900 | 2.32028700  | 0.30813500  |
| C | -7.18759900 | 0.64569700  | -0.10877000 |
| C | -6.32270700 | -1.60163000 | -0.15370200 |
| C | -5.67349900 | 3.90133500  | 0.33833000  |
| C | -3.27773800 | 3.70082800  | 0.51875400  |
| H | -2.47968800 | 1.71279600  | 0.29430800  |
| C | -8.48657000 | 0.15610700  | -0.11518300 |
| C | -7.63175000 | -2.09791600 | -0.16904100 |
| H | -5.48714200 | -2.29300900 | -0.16827600 |
| C | -4.42172000 | 4.49554900  | 0.53702900  |
| H | -6.58781800 | 4.48732500  | 0.34121200  |
| H | -2.29711400 | 4.14358300  | 0.66931900  |
| H | -9.30564100 | 0.86903700  | -0.09978500 |
| C | -8.71668100 | -1.22424500 | -0.14941600 |
| H | -7.78968700 | -3.17236100 | -0.19494900 |
| H | -4.35141400 | 5.56668600  | 0.70149200  |
| H | -9.73450700 | -1.60270300 | -0.16023000 |
| N | 4.77972400  | 0.33110600  | 0.13243800  |
| N | -4.77968300 | 0.33109300  | -0.13227200 |
| O | 7.03148200  | 2.02005400  | 0.11277400  |
| O | -7.031484   | 2.019997    | -0.113187   |

PXZ-3Py-SO<sub>2</sub>



| Atoms | x           | y           | z           |
|-------|-------------|-------------|-------------|
| C     | -2.93817000 | -0.64662500 | -1.40856300 |
| C     | -1.37343200 | 1.12664200  | -1.81987600 |
| C     | -1.96280800 | 1.82867200  | -0.76913100 |
| C     | -3.44855600 | 0.11984800  | -0.33064700 |
| H     | -3.37703700 | -1.59983600 | -1.67444000 |
| H     | -1.62048000 | 2.82791500  | -0.51216700 |
| S     | -0.01341400 | 1.83561900  | -2.74454900 |
| C     | 1.47688200  | 1.29763900  | -1.90770600 |
| C     | 2.01644900  | 2.04459200  | -0.86101700 |
| C     | 3.29082000  | -0.25061700 | -1.63198700 |
| H     | 1.54471700  | 2.97075300  | -0.54230000 |
| C     | 3.77002400  | 0.57209400  | -0.58237500 |
| H     | 3.80079800  | -1.16535400 | -1.90525300 |
| O     | -0.01337000 | 1.19305400  | -4.07233500 |
| O     | -0.09631200 | 3.29836400  | -2.58719800 |
| C     | 5.77475800  | -0.83031400 | -0.26800700 |
| C     | 5.12857000  | 0.65470500  | 1.49521100  |
| C     | 6.08531700  | -1.80253700 | 0.69103400  |
| C     | 6.34034700  | -0.93119200 | -1.54392000 |
| C     | 5.45512900  | -0.35820100 | 2.40956200  |
| C     | 5.04721800  | 1.97436800  | 1.95256900  |
| C     | 6.88461400  | -2.89919600 | 0.37615800  |
| C     | 7.13519500  | -2.03138700 | -1.87230100 |
| H     | 6.14185400  | -0.15510800 | -2.27722200 |
| C     | 5.64492900  | -0.08631100 | 3.76074300  |
| C     | 5.22984800  | 2.25376300  | 3.30962800  |
| H     | 4.81301000  | 2.76398000  | 1.25222400  |
| C     | 7.39594300  | -3.02053900 | -0.91750100 |
| H     | 7.09710300  | -3.63433600 | 1.14637000  |
| H     | 7.55624600  | -2.10980000 | -2.87049100 |
| H     | 5.89142900  | -0.90333800 | 4.43194200  |
| C     | 5.51557800  | 1.22794900  | 4.21443200  |
| H     | 5.14617700  | 3.27987100  | 3.65625100  |
| H     | 8.01520000  | -3.87601100 | -1.17203100 |
| H     | 5.65484100  | 1.44891100  | 5.26901500  |
| C     | -4.97500600 | -1.69049100 | 0.35600100  |
| C     | -5.42157300 | 0.53377600  | 1.12221200  |
| C     | -6.34854600 | -1.87612800 | 0.15555600  |
| C     | -4.15043500 | -2.81366600 | 0.48522200  |
| C     | -6.78523900 | 0.29013400  | 0.89921200  |
| C     | -5.05517800 | 1.58305800  | 1.97178800  |
| C     | -6.89203800 | -3.15084800 | 0.01157300  |
| C     | -4.68395800 | -4.09511600 | 0.33388900  |
| H     | -3.09232300 | -2.67627500 | 0.68755200  |
| C     | -7.77033400 | 1.09866400  | 1.45722500  |

|   |             |             |             |
|---|-------------|-------------|-------------|
| C | -6.03906900 | 2.40301500  | 2.53073700  |
| H | -4.00735600 | 1.76866900  | 2.16244200  |
| C | -6.05065600 | -4.26264600 | 0.08412500  |
| H | -7.96085200 | -3.25215500 | -0.15011200 |
| H | -4.03339900 | -4.96076700 | 0.41933000  |
| H | -8.81267400 | 0.87526300  | 1.25136500  |
| C | -7.39147100 | 2.17177100  | 2.26621700  |
| H | -5.74162300 | 3.22670000  | 3.17345100  |
| H | -6.46655600 | -5.25929900 | -0.03331700 |
| H | -8.15333800 | 2.81365200  | 2.69968000  |
| N | 4.92819200  | 0.24641400  | 0.13372500  |
| N | -4.49900000 | -0.34939300 | 0.46636300  |
| O | 5.60872900  | -1.66827600 | 1.97823400  |
| O | -7.18677200 | -0.78246200 | 0.11572100  |
| C | -1.89035100 | -0.13280500 | -2.15208200 |
| C | 2.13506900  | 0.12381500  | -2.29557400 |
| N | 3.13237100  | 1.69675500  | -0.21825900 |
| N | -2.96530200 | 1.33795700  | -0.03812200 |
| H | 1.74468900  | -0.47866700 | -3.11019200 |
| H | -1.49704900 | -0.67758400 | -3.00508200 |

### PXZ-2Py-SO<sub>2</sub>

| Atoms | x           | y           | z           |
|-------|-------------|-------------|-------------|
| C     | -2.57076100 | -0.47433600 | 0.87110300  |
| C     | -1.42547000 | -2.18093000 | -0.09846400 |
| C     | -2.33109900 | -2.32169700 | -1.14731500 |
| C     | -3.43296400 | -1.46526800 | -1.14739100 |
| C     | -3.55891200 | -0.52347800 | -0.12149200 |
| H     | -2.64408000 | 0.25465400  | 1.67490200  |
| H     | -2.16710400 | -3.06227900 | -1.92240700 |
| H     | -4.18352700 | -1.51715600 | -1.93127600 |
| S     | -0.00009200 | -3.31809600 | 0.00038800  |
| C     | 1.42532200  | -2.18096500 | 0.09904100  |
| C     | 2.33097900  | -2.32157300 | 1.14786900  |
| C     | 2.57057200  | -0.47451800 | -0.87082900 |
| C     | 3.43289100  | -1.46516900 | 1.14775900  |
| H     | 2.16700500  | -3.06201100 | 1.92310400  |
| C     | 3.55879900  | -0.52355000 | 0.12171200  |
| H     | 2.64387300  | 0.25437300  | -1.67472100 |
| H     | 4.18349400  | -1.51698500 | 1.93161000  |
| O     | -0.05285500 | -4.04777100 | 1.27750800  |
| O     | 0.05266300  | -4.04792700 | -1.27663800 |
| C     | 4.63004800  | 1.56656100  | 0.84441500  |
| C     | 5.88926600  | -0.03914600 | -0.48905400 |
| C     | 5.76320200  | 2.40036400  | 0.85020900  |

|   |             |             |             |
|---|-------------|-------------|-------------|
| C | 3.51534700  | 1.95951600  | 1.59518300  |
| C | 6.98841700  | 0.83771300  | -0.44709300 |
| C | 6.06033500  | -1.28644000 | -1.10165700 |
| C | 5.78366800  | 3.57999200  | 1.58226100  |
| C | 3.53080900  | 3.15239800  | 2.32790100  |
| H | 2.62699700  | 1.33717700  | 1.60570300  |
| C | 8.21446300  | 0.47983000  | -0.99153600 |
| C | 7.29327300  | -1.64651700 | -1.65854900 |
| H | 5.22774000  | -1.97974700 | -1.15337600 |
| C | 4.66214200  | 3.96526700  | 2.32562600  |
| H | 6.68326700  | 4.18763900  | 1.55395900  |
| H | 2.65021600  | 3.43464200  | 2.89788600  |
| H | 9.03175300  | 1.19245800  | -0.93227600 |
| C | 8.37319800  | -0.76809200 | -1.60498600 |
| H | 7.39594400  | -2.61861100 | -2.13222400 |
| H | 4.68124500  | 4.89134700  | 2.89243200  |
| H | 9.33251000  | -1.04139500 | -2.03425400 |
| C | -4.62966000 | 1.56693200  | -0.84405800 |
| C | -5.88961800 | -0.03904900 | 0.48838000  |
| C | -5.76273600 | 2.40084100  | -0.85011900 |
| C | -3.51459700 | 1.95999000  | -1.59423900 |
| C | -6.98868500 | 0.83790400  | 0.44614200  |
| C | -6.06104900 | -1.28646100 | 1.10064200  |
| C | -5.78275100 | 3.58069600  | -1.58181600 |
| C | -3.52960800 | 3.15310300  | -2.32659200 |
| H | -2.62632300 | 1.33754100  | -1.60459400 |
| C | -8.21500600 | 0.47997500  | 0.98993200  |
| C | -7.29427100 | -1.64658900 | 1.65687300  |
| H | -5.22852000 | -1.97982900 | 1.15260700  |
| C | -4.66085300 | 3.96609300  | -2.32455600 |
| H | -6.68230600 | 4.18841800  | -1.55374200 |
| H | -2.64874200 | 3.43541600  | -2.89612100 |
| H | -9.03221300 | 1.19268300  | 0.93048300  |
| C | -8.37411700 | -0.76808500 | 1.60300400  |
| H | -7.39721700 | -2.61878000 | 2.13029200  |
| H | -4.67961400 | 4.89235200  | -2.89108100 |
| H | -9.33364800 | -1.04142400 | 2.03175700  |
| N | 4.65852500  | 0.38332300  | 0.06840500  |
| N | -4.65860000 | 0.38344700  | -0.06844500 |
| O | 6.88897200  | 2.10085800  | 0.10622300  |
| O | -6.88889000 | 2.10119400  | -0.10677600 |
| N | 1.51598700  | -1.29587500 | -0.88591900 |
| N | -1.51617600 | -1.29570400 | 0.88634900  |

PTZ-Ph-SO

| Atoms | x           | y           | z           |
|-------|-------------|-------------|-------------|
| C     | 3.12110400  | -1.28135200 | -1.13819400 |
| C     | 2.02906900  | -2.15131300 | -1.15755300 |
| C     | 1.38550600  | -2.46090200 | 0.03979300  |
| C     | 1.83350900  | -1.94473400 | 1.25671700  |
| C     | 2.92306200  | -1.07135900 | 1.26792600  |
| C     | 3.56853100  | -0.73576400 | 0.07263400  |
| H     | 3.63496700  | -1.02818300 | -2.06162200 |
| H     | 1.68050200  | -2.60366700 | -2.08203200 |
| H     | 1.35001600  | -2.21872600 | 2.19142700  |
| H     | 3.28954900  | -0.65316300 | 2.20086100  |
| S     | -0.00001600 | -3.66345800 | -0.00393800 |
| C     | -1.38553700 | -2.46091000 | 0.03981700  |
| C     | -2.02897600 | -2.15112300 | -1.15754500 |
| C     | -1.83366400 | -1.94493600 | 1.25677900  |
| C     | -3.12100200 | -1.28115300 | -1.13815800 |
| H     | -1.68032700 | -2.60333800 | -2.08206200 |
| C     | -2.92320900 | -1.07155000 | 1.26801600  |
| H     | -1.35027700 | -2.21909600 | 2.19149400  |
| C     | -3.56854600 | -0.73575200 | 0.07271200  |
| H     | -3.63476800 | -1.02783100 | -2.06159800 |
| H     | -3.28979200 | -0.65350600 | 2.20098200  |
| C     | -6.00131800 | -0.41155500 | 0.13699400  |
| C     | -4.49269400 | 1.52477700  | -0.19347600 |
| C     | -7.10697900 | 0.36970300  | 0.52892200  |
| C     | -6.23099300 | -1.75045000 | -0.22130800 |
| C     | -5.45923500 | 2.48532000  | 0.16758200  |
| C     | -3.33444200 | 1.96827900  | -0.85348700 |
| C     | -8.39791800 | -0.16385500 | 0.51310100  |
| C     | -7.51973400 | -2.28918100 | -0.19424700 |
| H     | -5.40096300 | -2.38305500 | -0.51256100 |
| C     | -5.28751100 | 3.83030900  | -0.16851300 |
| C     | -3.15033500 | 3.32137900  | -1.14846200 |
| H     | -2.56401400 | 1.25829200  | -1.12955100 |
| C     | -8.61179200 | -1.49884400 | 0.16301000  |
| H     | -9.23306000 | 0.47030300  | 0.79887600  |
| H     | -7.66156600 | -3.33169300 | -0.46627000 |
| H     | -6.06131200 | 4.54348700  | 0.10329100  |
| C     | -4.12798000 | 4.25930700  | -0.81805200 |
| H     | -2.23793900 | 3.63292700  | -1.65000000 |
| C     | 4.49274700  | 1.52469200  | -0.19392100 |
| C     | 6.00129900  | -0.41157900 | 0.13721600  |
| C     | 5.45924400  | 2.48530500  | 0.16706700  |
| C     | 3.33460000  | 1.96805800  | -0.85420800 |
| C     | 7.10690800  | 0.36975300  | 0.52914600  |
| C     | 6.23101800  | -1.75055400 | -0.22076100 |

|   |             |             |             |
|---|-------------|-------------|-------------|
| C | 5.28759100  | 3.83021900  | -0.16936500 |
| C | 3.15055700  | 3.32109200  | -1.14952300 |
| H | 2.56420400  | 1.25801700  | -1.13022400 |
| C | 8.39784400  | -0.16382100 | 0.51364400  |
| C | 7.51974900  | -2.28929200 | -0.19338000 |
| H | 5.40102800  | -2.38321300 | -0.51201000 |
| C | 4.12816500  | 4.25908300  | -0.81918100 |
| H | 6.06136100  | 4.54344800  | 0.10239400  |
| H | 2.23824300  | 3.63253700  | -1.65127400 |
| H | 9.23294700  | 0.47039000  | 0.79941000  |
| C | 8.61175900  | -1.49888800 | 0.16387800  |
| H | 7.66161500  | -3.33186400 | -0.46515700 |
| N | -4.69593800 | 0.15429700  | 0.12731000  |
| N | 4.69592500  | 0.15428500  | 0.12720800  |
| S | -6.85169200 | 2.01083600  | 1.17022700  |
| S | 6.85153600  | 2.01103300  | 1.17004000  |
| H | -3.99439200 | 5.31028700  | -1.05772500 |
| H | -9.61690300 | -1.91057700 | 0.17248800  |
| H | 3.99462800  | 5.31000900  | -1.05911900 |
| H | 9.61686400  | -1.91063000 | 0.17360500  |
| O | -0.00001700 | -4.25703300 | -1.40127900 |

### PTZ-3Py-SO

| Atoms | x           | y           | z           |
|-------|-------------|-------------|-------------|
| C     | -3.17451900 | -1.50914700 | 1.26059300  |
| C     | -1.34809100 | -2.49245400 | 0.07984900  |
| C     | -1.73960600 | -1.76708000 | -1.04766800 |
| C     | -3.47318400 | -0.79177900 | 0.09426600  |
| H     | -3.79364500 | -1.38904800 | 2.14447900  |
| H     | -1.20584800 | -1.85519700 | -1.99273800 |
| S     | 0.03835200  | -3.69385500 | 0.02971600  |
| C     | 1.41207600  | -2.48351100 | 0.02604100  |
| C     | 1.93768800  | -2.00072700 | -1.17303600 |
| C     | 3.06784600  | -1.21580200 | 1.18480200  |
| H     | 1.52920200  | -2.30916300 | -2.13437400 |
| C     | 3.51490300  | -0.76057700 | -0.06504000 |
| H     | 3.55805600  | -0.87444000 | 2.09155000  |
| C     | 5.93253400  | -0.33000600 | -0.04124900 |
| C     | 4.30572200  | 1.54963700  | -0.10628200 |
| C     | 7.02037200  | 0.45309000  | -0.47753700 |
| C     | 6.20627800  | -1.59842400 | 0.49739200  |
| C     | 5.24279700  | 2.50094000  | -0.55443700 |
| C     | 3.07681200  | 2.01386400  | 0.39165500  |
| C     | 8.33171200  | -0.00367700 | -0.32347600 |
| C     | 7.51805800  | -2.06607200 | 0.60745800  |
| H     | 5.39490000  | -2.23928600 | 0.82194300  |

|   |             |             |             |
|---|-------------|-------------|-------------|
| C | 4.96613100  | 3.86738700  | -0.46349700 |
| C | 2.78950500  | 3.37995000  | 0.43791400  |
| H | 2.32856800  | 1.30822100  | 0.73439600  |
| C | 8.58983000  | -1.26833000 | 0.20944400  |
| H | 9.15076300  | 0.63263300  | -0.64842900 |
| H | 7.69221100  | -3.05762900 | 1.01652800  |
| H | 5.71690300  | 4.57890900  | -0.79726100 |
| C | 3.73498100  | 4.31562200  | 0.01975400  |
| H | 1.82237400  | 3.70474000  | 0.81204400  |
| H | 9.61246100  | -1.62145400 | 0.30561300  |
| H | 3.52173400  | 5.37970200  | 0.06448600  |
| C | -4.45907800 | 1.39572500  | 0.64423600  |
| C | -5.83385900 | -0.39654500 | -0.38888900 |
| C | -5.33923400 | 2.43251300  | 0.27225600  |
| C | -3.46996800 | 1.68131500  | 1.60024500  |
| C | -6.83357100 | 0.47479900  | -0.86154900 |
| C | -6.11350400 | -1.77252700 | -0.35456300 |
| C | -5.25760300 | 3.68729000  | 0.88148100  |
| C | -3.36685400 | 2.95168700  | 2.17227500  |
| H | -2.76210200 | 0.91597400  | 1.89561700  |
| C | -8.08059900 | -0.02048400 | -1.25122200 |
| C | -7.34685300 | -2.26518800 | -0.78648100 |
| H | -5.36246000 | -2.46932400 | 0.00081800  |
| C | -4.26605100 | 3.95941600  | 1.82625900  |
| H | -5.96492400 | 4.45939400  | 0.59022900  |
| H | -2.58270800 | 3.14085000  | 2.90060900  |
| H | -8.84092900 | 0.67730800  | -1.59219300 |
| C | -8.34027600 | -1.39244600 | -1.23009100 |
| H | -7.52719600 | -3.33648900 | -0.76163700 |
| H | -4.19942700 | 4.94446500  | 2.27900300  |
| H | -9.30570100 | -1.76907500 | -1.55556500 |
| N | 4.60527600  | 0.16193300  | -0.16132600 |
| N | -4.58137800 | 0.11242700  | 0.04821100  |
| C | -2.08692500 | -2.38144800 | 1.25471300  |
| C | 1.99791500  | -2.10567700 | 1.23280400  |
| N | 2.96697200  | -1.14696300 | -1.22001200 |
| N | -2.77608300 | -0.92334400 | -1.03951000 |
| H | -1.81420900 | -2.97525300 | 2.12327300  |
| H | 1.62550000  | -2.51138300 | 2.16988500  |
| O | 0.05326900  | -4.34917900 | 1.39861200  |
| S | -6.47996200 | 2.20561600  | -1.07561000 |
| S | 6.74064100  | 1.97465000  | -1.35780900 |
| C | -3.17451900 | -1.50914700 | 1.26059300  |

### PTZ-2Py-SO

| Atoms | x           | y           | z          |
|-------|-------------|-------------|------------|
| C     | -2.71839100 | -1.12570000 | 0.95987000 |

|   |             |             |             |
|---|-------------|-------------|-------------|
| C | -1.38445700 | -2.44623200 | -0.32394300 |
| C | -2.08116500 | -2.16556600 | -1.49798400 |
| C | -3.16194700 | -1.28928700 | -1.39787600 |
| C | -3.49184600 | -0.75400900 | -0.14876800 |
| H | -2.95362800 | -0.73700900 | 1.94855400  |
| H | -1.78201800 | -2.62856100 | -2.43325400 |
| H | -3.75404400 | -1.01997000 | -2.26823100 |
| S | -0.00007700 | -3.67062500 | -0.39985300 |
| C | 1.38437300  | -2.44628600 | -0.32406600 |
| C | 2.08156100  | -2.16641600 | -1.49801300 |
| C | 2.71798200  | -1.12514100 | 0.95945100  |
| C | 3.16245400  | -1.29026000 | -1.39801400 |
| H | 1.78269800  | -2.62992700 | -2.43311700 |
| C | 3.49193300  | -0.75425400 | -0.14911000 |
| H | 2.95282400  | -0.73579800 | 1.94797200  |
| H | 3.75494100  | -1.02158100 | -2.26830000 |
| C | 5.86483300  | -0.40476400 | 0.37150700  |
| C | 4.36684100  | 1.53638200  | 0.01458900  |
| C | 7.04932500  | 0.31702200  | 0.12607700  |
| C | 5.96690200  | -1.65524600 | 1.00193500  |
| C | 5.41405000  | 2.43768800  | -0.26224400 |
| C | 3.09985200  | 2.06275100  | 0.31383800  |
| C | 8.28613700  | -0.18430200 | 0.53928500  |
| C | 7.21127600  | -2.16941300 | 1.37464100  |
| H | 5.07556000  | -2.24044700 | 1.19588900  |
| C | 5.20208400  | 3.81692000  | -0.19465100 |
| C | 2.88537800  | 3.44302600  | 0.33808200  |
| H | 2.27006300  | 1.39670600  | 0.51940500  |
| C | 8.37627400  | -1.43504700 | 1.15397500  |
| H | 9.18116400  | 0.40443200  | 0.35633300  |
| H | 7.25864700  | -3.14550000 | 1.84972300  |
| H | 6.03415500  | 4.48789700  | -0.39108400 |
| C | 3.93493100  | 4.32823600  | 0.09361400  |
| H | 1.89104300  | 3.81951100  | 0.56259900  |
| H | 9.34428400  | -1.82601700 | 1.45375400  |
| H | 3.77491700  | 5.40210100  | 0.12475900  |
| C | -4.36665800 | 1.53657600  | 0.01647900  |
| C | -5.86502600 | -0.40478200 | 0.37066600  |
| C | -5.41363500 | 2.43819700  | -0.26020100 |
| C | -3.09983000 | 2.06259900  | 0.31701600  |
| C | -7.04931100 | 0.31729600  | 0.12511900  |
| C | -5.96757200 | -1.65582600 | 0.99990700  |
| C | -5.20163200 | 3.81735600  | -0.19122800 |
| C | -2.88529500 | 3.44283900  | 0.34266200  |
| H | -2.27021200 | 1.39632400  | 0.52252400  |
| C | -8.28642300 | -0.18434300 | 0.53705200  |

|   |             |             |             |
|---|-------------|-------------|-------------|
| C | -7.21221600 | -2.17026900 | 1.37132000  |
| H | -5.07637800 | -2.24122500 | 1.19394500  |
| C | -3.93463400 | 4.32833500  | 0.09831500  |
| H | -6.03353700 | 4.48855800  | -0.38759000 |
| H | -1.89108800 | 3.81906000  | 0.56818900  |
| H | -9.18130300 | 0.40459500  | 0.35403900  |
| C | -8.37703100 | -1.43564500 | 1.15053500  |
| H | -7.25995700 | -3.14677100 | 1.84551200  |
| H | -3.77457300 | 5.40216100  | 0.13054200  |
| H | -9.34526100 | -1.82683700 | 1.44931100  |
| N | 4.60898300  | 0.13455800  | -0.02924200 |
| N | -4.60887100 | 0.13481100  | -0.02876800 |
| N | 1.68031200  | -1.96673700 | 0.87741900  |
| N | -1.68078800 | -1.96736900 | 0.87772100  |
| O | -0.00010500 | -4.19299600 | -1.82800800 |
| S | -6.98828400 | 1.82465800  | -0.82097600 |
| S | 6.98901100  | 1.82351800  | -0.82144200 |

### PTZ-Ph-SO<sub>2</sub>

| Atoms | x           | y           | z           |
|-------|-------------|-------------|-------------|
| C     | 3.10041300  | -1.05053400 | -1.15111700 |
| C     | 1.98659600  | -1.89051800 | -1.15029800 |
| C     | 1.43353100  | -2.28421900 | 0.07081400  |
| C     | 1.97788100  | -1.86211500 | 1.28523100  |
| C     | 3.09128200  | -1.02011700 | 1.27364100  |
| C     | 3.65282200  | -0.60962500 | 0.05976500  |
| H     | 3.55095400  | -0.74111800 | -2.08993800 |
| H     | 1.56623500  | -2.25787000 | -2.08110600 |
| H     | 1.55106700  | -2.20593100 | 2.22197300  |
| H     | 3.53914500  | -0.68152800 | 2.20314600  |
| S     | -0.00001200 | -3.38440300 | 0.07724300  |
| C     | -1.43357300 | -2.28424100 | 0.07091600  |
| C     | -1.98627600 | -1.88993000 | -1.15016800 |
| C     | -1.97828900 | -1.86275400 | 1.28537800  |
| C     | -3.10008400 | -1.04994500 | -1.15090200 |
| H     | -1.56564100 | -2.25680200 | -2.08104300 |
| C     | -3.09170700 | -1.02076900 | 1.27387500  |
| H     | -1.55173900 | -2.20704200 | 2.22206600  |
| C     | -3.65287700 | -0.60966300 | 0.06004100  |
| H     | -3.55033100 | -0.74003500 | -2.08970000 |
| H     | -3.53985900 | -0.68266200 | 2.20341600  |
| O     | -0.00004000 | -4.10679500 | -1.20715300 |
| O     | 0.00002400  | -4.09348300 | 1.36833200  |
| C     | -6.09005100 | -0.34639000 | -0.03713300 |
| C     | -4.61443300 | 1.64307300  | -0.12607900 |



|   |             |             |             |
|---|-------------|-------------|-------------|
| C | -7.24288500 | 0.38158400  | 0.31880400  |
| C | -6.25372900 | -1.66325100 | -0.49770700 |
| C | -5.63269000 | 2.55418000  | 0.22063500  |
| C | -3.42244400 | 2.15663800  | -0.66368800 |
| C | -8.51330200 | -0.17998500 | 0.17041800  |
| C | -7.52513100 | -2.23280300 | -0.60337600 |
| H | -5.38728300 | -2.25684500 | -0.76409900 |
| C | -5.47388500 | 3.92224000  | -0.01318600 |
| C | -3.25484300 | 3.53044700  | -0.85501700 |
| H | -2.61259600 | 1.48574800  | -0.92426600 |
| C | -8.66240400 | -1.49352400 | -0.28003200 |
| H | -9.38516700 | 0.41392300  | 0.43187600  |
| H | -7.61651600 | -3.25836300 | -0.95073400 |
| H | -6.28599000 | 4.59739700  | 0.24346400  |
| C | -4.28114300 | 4.42082600  | -0.54154400 |
| H | -2.31599400 | 3.89620700  | -1.26226200 |
| C | 4.61448300  | 1.64298300  | -0.12738700 |
| C | 6.09003100  | -0.34644800 | -0.03656300 |
| C | 5.63265100  | 2.55428800  | 0.21927700  |
| C | 3.42281100  | 2.15626100  | -0.66585700 |
| C | 7.24271300  | 0.38168900  | 0.31952000  |
| C | 6.25388300  | -1.66355800 | -0.49636400 |
| C | 5.47401700  | 3.92216700  | -0.01547500 |
| C | 3.25535700  | 3.52999800  | -0.85813000 |
| H | 2.61302200  | 1.48529700  | -0.92642500 |
| C | 8.51318800  | -0.17999100 | 0.17204100  |
| C | 7.52531800  | -2.23319900 | -0.60112100 |
| H | 5.38754100  | -2.25725900 | -0.76285800 |
| C | 4.28151900  | 4.42049800  | -0.54473900 |
| H | 6.28598800  | 4.59750100  | 0.24113600  |
| H | 2.31669900  | 3.89548000  | -1.26606400 |
| H | 9.38494500  | 0.41403700  | 0.43358500  |
| C | 8.66246000  | -1.49377700 | -0.27762800 |
| H | 7.61684800  | -3.25894500 | -0.94789200 |
| N | -4.80351000 | 0.24985000  | 0.09049400  |
| N | 4.80345600  | 0.24989800  | 0.09014100  |
| S | -7.08290200 | 1.98278000  | 1.08025600  |
| S | 7.08236700  | 1.98330700  | 1.07999700  |
| H | 9.65338700  | -1.92888400 | -0.36980400 |
| H | 4.16033400  | 5.48788700  | -0.70517900 |
| H | -4.15975000 | 5.48829700  | -0.70128300 |
| H | -9.653302   | -1.928547   | -0.372913   |

**PTZ-3Py-SO<sub>2</sub>**

| Atoms | x | y | z |
|-------|---|---|---|
|-------|---|---|---|

|   |             |             |             |
|---|-------------|-------------|-------------|
| C | -3.12503800 | 1.01536300  | 1.09711100  |
| C | -1.42866600 | -0.47168300 | 1.91913700  |
| C | -1.99509400 | -1.47711200 | 1.13583000  |
| C | -3.61028200 | -0.05630800 | 0.30610600  |
| H | -3.62028300 | 1.97813700  | 1.09949700  |
| H | -1.59082500 | -2.48609800 | 1.15544500  |
| S | -0.00005100 | -0.80683400 | 2.94612800  |
| C | 1.42860900  | -0.47171000 | 1.91918900  |
| C | 1.99513100  | -1.47718400 | 1.13601200  |
| C | 3.12496300  | 1.01533800  | 1.09713300  |
| H | 1.59090500  | -2.48618600 | 1.15569500  |
| C | 3.61030200  | -0.05638300 | 0.30624500  |
| H | 3.62017500  | 1.97812900  | 1.09947100  |
| O | -0.00006400 | 0.20097700  | 4.02360000  |
| O | -0.00006400 | -2.25230400 | 3.23226500  |
| C | -2.02261200 | 0.79718700  | 1.90477400  |
| C | 2.02250200  | 0.79718700  | 1.90474900  |
| N | 3.05080300  | -1.27683500 | 0.34557300  |
| N | -3.05072900 | -1.27674100 | 0.34535100  |
| N | 4.71304000  | 0.10046000  | -0.53678900 |
| C | 5.33581700  | 1.37512800  | -0.71874400 |
| C | 5.45085900  | -1.02830800 | -1.03116200 |
| C | 6.67980800  | 1.53642800  | -0.34672200 |
| C | 4.64490000  | 2.44547900  | -1.29950600 |
| C | 6.81064100  | -1.12823900 | -0.69786800 |
| C | 4.86986800  | -1.99365100 | -1.85977500 |
| C | 7.30850400  | 2.77669400  | -0.51181100 |
| S | 7.56147300  | 0.13674200  | 0.31843000  |
| C | 5.26632400  | 3.68653100  | -1.44189600 |
| H | 3.61752100  | 2.29983100  | -1.62134700 |
| C | 7.57321300  | -2.20622200 | -1.16171800 |
| C | 5.62692500  | -3.07784200 | -2.30422100 |
| H | 3.82363900  | -1.90315800 | -2.12553400 |
| C | 6.59584000  | 3.85443700  | -1.03870000 |
| H | 8.35286000  | 2.88938300  | -0.23410800 |
| H | 4.71843600  | 4.51644000  | -1.87949300 |
| H | 8.62845700  | -2.26555300 | -0.90994500 |
| C | 6.97491000  | -3.19018000 | -1.94911400 |
| H | 5.16283800  | -3.83368400 | -2.93171800 |
| N | -4.71294600 | 0.10055600  | -0.53702800 |
| C | -5.45060900 | -1.02824200 | -1.03156500 |
| C | -5.33599100 | 1.37514700  | -0.71863800 |
| C | -6.81035900 | -1.12851100 | -0.69812800 |
| C | -4.86952700 | -1.99328100 | -1.86041400 |
| C | -6.67996500 | 1.53611500  | -0.34640800 |
| C | -4.64533900 | 2.44574000  | -1.29925900 |
| C | -7.57274600 | -2.20653300 | -1.16211200 |
| S | -7.56128600 | 0.13611500  | 0.31854000  |

|   |             |             |             |
|---|-------------|-------------|-------------|
| C | -5.62642300 | -3.07755500 | -2.30501600 |
| H | -3.82334200 | -1.90256000 | -2.12627700 |
| C | -7.30890700 | 2.77630300  | -0.51114600 |
| C | -5.26700800 | 3.68671100  | -1.44130300 |
| H | -3.61797500 | 2.30033700  | -1.62125800 |
| C | -6.97432300 | -3.19022800 | -1.94979400 |
| H | -8.62795600 | -2.26616400 | -0.91026300 |
| H | -5.16221700 | -3.83315800 | -2.93270900 |
| H | -8.35324800 | 2.88874800  | -0.23328700 |
| C | -6.59650100 | 3.85428600  | -1.03789600 |
| H | -4.71933200 | 4.51681800  | -1.87879200 |
| H | -1.64125400 | 1.58558300  | 2.54669900  |
| H | 1.64108200  | 1.58562200  | 2.54658800  |
| H | -7.08648800 | 4.81683400  | -1.15625000 |
| H | -7.56511500 | -4.03182800 | -2.30116300 |
| H | 7.08563800  | 4.81704800  | -1.15732100 |
| H | 7.56578900  | -4.03175600 | -2.30039400 |

### PTZ-2Py-SO<sub>2</sub>

| Atoms | x           | y           | z           |
|-------|-------------|-------------|-------------|
| C     | -2.94232200 | -1.18053900 | 0.91317500  |
| C     | -1.48421800 | -2.18680400 | -0.50914300 |
| C     | -2.07142100 | -1.63204500 | -1.64667700 |
| C     | -3.16673800 | -0.79006300 | -1.44888200 |
| C     | -3.61406300 | -0.55239900 | -0.14708900 |
| H     | -3.27073200 | -1.02556200 | 1.93878200  |
| H     | -1.69513600 | -1.86527900 | -2.63663700 |
| H     | -3.67845200 | -0.32321800 | -2.28559900 |
| S     | -0.05731400 | -3.31342900 | -0.72541800 |
| C     | 1.40639000  | -2.22073100 | -0.60589900 |
| C     | 2.42469700  | -2.37309400 | -1.54606400 |
| C     | 2.51775200  | -0.61205700 | 0.55567000  |
| C     | 3.56169000  | -1.58055900 | -1.38179700 |
| H     | 2.32118800  | -3.07660900 | -2.36501700 |
| C     | 3.61710600  | -0.68218000 | -0.31319300 |
| H     | 2.52421800  | 0.08229800  | 1.39318200  |
| H     | 4.39981700  | -1.64703500 | -2.06963900 |
| O     | -0.02216400 | -4.26664000 | 0.38742600  |
| O     | -0.09868600 | -3.77672500 | -2.12764000 |
| C     | 5.76427900  | -0.28575600 | 0.80536000  |
| C     | 4.74373500  | 1.47880900  | -0.60736200 |
| C     | 7.06234900  | 0.25755200  | 0.74589500  |
| C     | 5.48967200  | -1.24839900 | 1.78970500  |
| C     | 5.94897500  | 2.18405700  | -0.79493400 |
| C     | 3.53826400  | 2.12900000  | -0.91685600 |
| C     | 8.03518900  | -0.12375400 | 1.67320600  |
| C     | 6.47986100  | -1.65574300 | 2.68729500  |

|   |             |             |             |
|---|-------------|-------------|-------------|
| H | 4.50490500  | -1.69617100 | 1.85570500  |
| C | 5.93516300  | 3.50995100  | -1.23494900 |
| C | 3.53486300  | 3.44120900  | -1.39678000 |
| H | 2.59394600  | 1.61101400  | -0.79628100 |
| C | 7.75404700  | -1.09084300 | 2.64069500  |
| H | 9.02200300  | 0.32816800  | 1.61771000  |
| H | 6.24020200  | -2.41183000 | 3.42985300  |
| H | 6.87889800  | 4.03663700  | -1.34929800 |
| C | 4.73053400  | 4.14231200  | -1.55023400 |
| H | 2.58630300  | 3.91275300  | -1.63903800 |
| C | -4.49873700 | 1.65542800  | 0.46665300  |
| C | -6.02474300 | -0.28263800 | 0.22178400  |
| C | -5.51407100 | 2.61895000  | 0.30605900  |
| C | -3.26859000 | 2.06818300  | 1.00312900  |
| C | -7.17927600 | 0.50252400  | 0.03762100  |
| C | -6.18552200 | -1.64073700 | 0.53884600  |
| C | -5.31070900 | 3.93996200  | 0.71279100  |
| C | -3.05854400 | 3.40025500  | 1.36872300  |
| H | -2.46298300 | 1.35451500  | 1.13091100  |
| C | -8.45007300 | -0.05227600 | 0.20798300  |
| C | -7.46005100 | -2.19855800 | 0.66632400  |
| H | -5.31723700 | -2.27439400 | 0.67820800  |
| C | -4.07897600 | 4.34141900  | 1.23440000  |
| H | -6.11941600 | 4.65689600  | 0.59825800  |
| H | -2.09250900 | 3.69107000  | 1.77251100  |
| H | -9.32354300 | 0.58190700  | 0.08160500  |
| C | -8.59824000 | -1.40768700 | 0.51018100  |
| H | -7.55288300 | -3.25546400 | 0.90056000  |
| N | 4.77638000  | 0.13706000  | -0.13114600 |
| N | -4.73668000 | 0.30791300  | 0.07214000  |
| N | 1.42800200  | -1.37324100 | 0.41602400  |
| N | -1.89021500 | -1.98447300 | 0.73691500  |
| S | 7.50773800  | 1.34882700  | -0.58893900 |
| S | -7.02563900 | 2.18394900  | -0.52884800 |
| H | -3.92384200 | 5.37481900  | 1.53067700  |
| H | -9.59048100 | -1.83531100 | 0.62119800  |
| H | 4.73131100  | 5.16681900  | -1.91090700 |
| H | 8.52262500  | -1.39595800 | 3.34488900  |

### DMAC-Ph-SO

| Atoms | x          | y           | z           |
|-------|------------|-------------|-------------|
| C     | 3.02053000 | -1.33401600 | -1.08996300 |
| C     | 1.94007200 | -2.21606600 | -1.10512900 |
| C     | 1.39899500 | -2.64910000 | 0.10603500  |
| C     | 1.94249900 | -2.24679000 | 1.32628300  |
| C     | 3.02345400 | -1.36073300 | 1.33352300  |
| C     | 3.56202700 | -0.90027200 | 0.12861200  |

|   |             |             |             |
|---|-------------|-------------|-------------|
| H | 3.45439000  | -0.98038600 | -2.02121800 |
| H | 1.52322800  | -2.58302500 | -2.03912300 |
| H | 1.54126900  | -2.62238400 | 2.26481200  |
| H | 3.46287100  | -1.03163500 | 2.27070000  |
| S | 0.01203400  | -3.84602100 | 0.07909800  |
| C | -1.36652900 | -2.63235800 | 0.08163300  |
| C | -2.08565500 | -2.45896200 | -1.10001000 |
| C | -1.73314500 | -1.97214000 | 1.25565600  |
| C | -3.17321600 | -1.58286900 | -1.11267700 |
| H | -1.79312200 | -3.01501300 | -1.98652100 |
| C | -2.81933800 | -1.09502000 | 1.23381600  |
| H | -1.18457600 | -2.13113400 | 2.18100600  |
| C | -3.54024900 | -0.89585400 | 0.05114700  |
| H | -3.74515200 | -1.43149100 | -2.02402600 |
| H | -3.12018500 | -0.56556900 | 2.13321600  |
| C | -5.96484500 | -0.52294300 | 0.19309500  |
| C | -4.49062900 | 1.31381800  | -0.45447900 |
| C | -7.05443900 | 0.36800600  | 0.32643000  |
| C | -6.19026200 | -1.91096600 | 0.19130800  |
| C | -5.55331900 | 2.23875600  | -0.33396000 |
| C | -3.29202200 | 1.70165800  | -1.07943600 |
| C | -8.34466800 | -0.17239900 | 0.38125200  |
| C | -7.48574200 | -2.41842800 | 0.27770700  |
| H | -5.35588800 | -2.59778500 | 0.11173700  |
| C | -5.39657700 | 3.50244900  | -0.91549400 |
| C | -3.15676300 | 2.97833600  | -1.62265200 |
| H | -2.46622300 | 1.00390800  | -1.15235100 |
| C | -8.57383900 | -1.55020600 | 0.35468500  |
| H | -9.19813600 | 0.49150400  | 0.46513600  |
| H | -7.63668200 | -3.49490300 | 0.27120700  |
| H | -6.20499800 | 4.22263000  | -0.85234800 |
| C | -4.21685900 | 3.88161700  | -1.56053200 |
| H | -2.22288800 | 3.25464700  | -2.10568900 |
| C | 4.43317500  | 1.39162800  | 0.00543800  |
| C | 5.98008700  | -0.49893800 | -0.05729500 |
| C | 5.50928700  | 2.29729200  | 0.14885100  |
| C | 3.14581100  | 1.87404300  | -0.29089300 |
| C | 7.08490800  | 0.37192600  | 0.08387000  |
| C | 6.18856700  | -1.84378900 | -0.41154600 |
| C | 5.26263000  | 3.65557200  | -0.08364900 |
| C | 2.92717800  | 3.23677200  | -0.48676400 |
| H | 2.31356900  | 1.18557400  | -0.37830100 |
| C | 8.35911600  | -0.12717600 | -0.21139300 |
| C | 7.47382500  | -2.31751900 | -0.67021400 |
| H | 5.34760100  | -2.52190600 | -0.49551500 |
| C | 3.98991000  | 4.13515000  | -0.40262400 |

|   |             |             |             |
|---|-------------|-------------|-------------|
| H | 6.07605400  | 4.36772700  | 0.00230400  |
| H | 1.92396200  | 3.58703800  | -0.71601500 |
| H | 9.22046500  | 0.52655400  | -0.12851100 |
| C | 8.56665600  | -1.45565100 | -0.59017500 |
| H | 7.61059900  | -3.36009000 | -0.94573600 |
| N | -4.65824000 | 0.00510000  | 0.05763200  |
| N | 4.67528900  | 0.00571300  | 0.16107500  |
| H | 9.57107700  | -1.81036700 | -0.80415900 |
| H | 3.83391100  | 5.19766400  | -0.56757000 |
| H | -4.12774300 | 4.87395600  | -1.99389200 |
| H | -9.58874200 | -1.93450000 | 0.40747300  |
| C | -6.76531300 | 1.86004600  | 0.52441000  |
| C | 6.85213000  | 1.77035100  | 0.66649500  |
| C | 6.74776200  | 1.63269600  | 2.21655300  |
| H | 7.683093    | 1.231925    | 2.625552    |
| H | 6.55476     | 2.611488    | 2.67209     |
| H | 5.93457     | 0.957806    | 2.502214    |
| C | 8.014049    | 2.731968    | 0.356282    |
| H | 7.845069    | 3.708678    | 0.819356    |
| H | 8.95275     | 2.355595    | 0.773509    |
| H | 8.147364    | 2.8776      | -0.721683   |
| C | -6.381673   | 2.080478    | 2.019921    |
| H | -6.141302   | 3.135555    | 2.198294    |
| H | -7.216054   | 1.794142    | 2.671518    |
| H | -5.509783   | 1.480583    | 2.299581    |
| C | -7.993187   | 2.737442    | 0.219114    |
| H | -8.829931   | 2.476862    | 0.87404     |
| H | -7.774551   | 3.792463    | 0.409234    |
| H | -8.32169    | 2.633342    | -0.821206   |
| O | 0.007846    | -4.476659   | -1.301877   |

### DMAC-3Py-SO

| Atoms | x           | y           | z           |
|-------|-------------|-------------|-------------|
| C     | 3.20576200  | -1.64454500 | -1.26964100 |
| C     | 1.36549500  | -2.64657400 | -0.12657400 |
| C     | 1.73685300  | -1.93382600 | 1.01563200  |
| C     | 3.49009900  | -0.95106500 | -0.08751300 |
| H     | 3.83150800  | -1.49733500 | -2.14439100 |
| H     | 1.18571700  | -2.03178200 | 1.94981300  |
| S     | -0.02074400 | -3.84956100 | -0.11139000 |
| C     | -1.39549100 | -2.64154900 | -0.08520900 |
| C     | -1.94659400 | -2.21812400 | 1.12474700  |
| C     | -3.02897700 | -1.32140300 | -1.21747800 |
| H     | -1.55787800 | -2.57425900 | 2.07786900  |
| C     | -3.49898400 | -0.92517800 | 0.04268500  |

|   |             |             |             |
|---|-------------|-------------|-------------|
| H | -3.50791700 | -0.94052700 | -2.11409200 |
| O | -0.02699300 | -4.47525400 | -1.49392200 |
| C | 2.11960300  | -2.51840800 | -1.29050100 |
| C | -1.95719400 | -2.20743800 | -1.28526500 |
| N | -2.97808000 | -1.36743600 | 1.19112600  |
| N | 2.77565800  | -1.09205400 | 1.03487800  |
| H | 1.85532400  | -3.09626800 | -2.17222900 |
| H | -1.56656700 | -2.56971800 | -2.23261500 |
| C | -5.90985200 | -0.52308800 | 0.09187300  |
| C | -4.33402200 | 1.36164600  | 0.27156000  |
| C | -7.01516100 | 0.35270200  | 0.09069500  |
| C | -6.12228100 | -1.91637400 | 0.05277100  |
| C | -5.39264500 | 2.29316300  | 0.28057600  |
| C | -3.00422900 | 1.81414500  | 0.39148400  |
| C | -8.29684100 | -0.21316500 | 0.02611700  |
| C | -6.86460900 | 1.87872800  | 0.15066000  |
| C | -7.40818700 | -2.44334500 | -0.01006700 |
| H | -5.27763600 | -2.59490400 | 0.08285100  |
| C | -5.06629300 | 3.65197400  | 0.40073300  |
| C | -2.71689700 | 3.16997000  | 0.51087600  |
| H | -2.18833100 | 1.10119100  | 0.40608300  |
| C | -8.51153300 | -1.58938100 | -0.02869800 |
| H | -9.16051400 | 0.44563200  | 0.01620100  |
| H | -7.54117700 | -3.52173700 | -0.03889400 |
| H | -5.86804200 | 4.38493200  | 0.40347900  |
| C | -3.75289400 | 4.10473900  | 0.51383700  |
| H | -1.68227900 | 3.48882000  | 0.60786900  |
| H | -9.52215800 | -1.98462200 | -0.07924300 |
| H | -3.54551100 | 5.16712800  | 0.60587000  |
| C | 4.39089900  | 1.29980100  | -0.39669400 |
| C | 5.85049700  | -0.52215700 | 0.38763900  |
| C | 5.46822100  | 2.20994700  | -0.40364700 |
| C | 3.10022600  | 1.74362300  | -0.75083700 |
| C | 6.97088900  | 0.33393600  | 0.40655200  |
| C | 5.99053200  | -1.86481400 | 0.79417500  |
| C | 5.20348400  | 3.53348400  | -0.78467300 |
| C | 6.89814200  | 1.80632900  | -0.01980000 |
| C | 2.87370800  | 3.06437600  | -1.12431200 |
| H | 2.26453200  | 1.05395000  | -0.72609300 |
| C | 8.19647300  | -0.20269700 | 0.82752000  |
| C | 7.22188800  | -2.36385500 | 1.20607800  |
| H | 5.12922500  | -2.52247700 | 0.79848800  |
| C | 3.93157900  | 3.97398600  | -1.14698500 |
| H | 6.02204300  | 4.24749600  | -0.80081300 |
| H | 1.86808800  | 3.37718600  | -1.39361700 |
| H | 9.07173600  | 0.44051400  | 0.84464400  |

|   |             |             |             |
|---|-------------|-------------|-------------|
| C | 8.34139400  | -1.53109800 | 1.22393600  |
| H | 7.29907400  | -3.40302500 | 1.51537200  |
| H | 3.77183600  | 5.00865000  | -1.43696600 |
| H | 9.31021700  | -1.90530000 | 1.54254200  |
| N | -4.59659000 | -0.01501000 | 0.12744400  |
| N | 4.59745700  | -0.04880900 | -0.04838600 |
| C | 7.83233300  | 2.02636300  | -1.24248300 |
| H | 8.86774200  | 1.76483500  | -0.99850900 |
| H | 7.516133    | 1.406932    | -2.088929   |
| H | 7.819224    | 3.073419    | -1.564246   |
| C | 7.378213    | 2.699864    | 1.15772     |
| H | 6.735318    | 2.562952    | 2.033738    |
| H | 8.405176    | 2.453791    | 1.44725     |
| H | 7.358671    | 3.759747    | 0.883185    |
| C | -7.45192    | 2.497382    | -1.148751   |
| H | -8.509093   | 2.234917    | -1.265864   |
| H | -7.377994   | 3.590285    | -1.132033   |
| H | -6.912208   | 2.134036    | -2.030171   |
| C | -7.65408    | 2.418378    | 1.375745    |
| H | -7.260063   | 1.995526    | 2.306006    |
| H | -7.585151   | 3.509148    | 1.441514    |
| H | -8.715939   | 2.160292    | 1.307178    |

### DMAC-2Py-SO

| Atoms | x           | y           | z           |
|-------|-------------|-------------|-------------|
| C     | -2.42403000 | -1.01449500 | 0.65233700  |
| C     | -1.32592900 | -2.71828600 | -0.38772500 |
| C     | -2.26358200 | -2.79817800 | -1.41562600 |
| C     | -3.34128000 | -1.90941900 | -1.38094400 |
| C     | -3.42956500 | -0.99918900 | -0.32833200 |
| H     | -2.46494100 | -0.31368100 | 1.48374100  |
| H     | -2.15512700 | -3.52611900 | -2.21423300 |
| H     | -4.10551700 | -1.91758700 | -2.15295400 |
| S     | 0.05060100  | -3.95361000 | -0.37840400 |
| C     | 1.39986100  | -2.73101700 | -0.13978300 |
| C     | 2.11348000  | -2.74083600 | 1.05381000  |
| C     | 2.64804900  | -1.06342900 | -1.05290700 |
| C     | 3.16176900  | -1.82614600 | 1.17017800  |
| H     | 1.83817000  | -3.43180900 | 1.84438600  |
| C     | 3.43792800  | -0.96915900 | 0.10240400  |
| H     | 2.84180500  | -0.41080400 | -1.90142600 |
| H     | 3.76110800  | -1.76786700 | 2.07460700  |
| C     | 4.19714000  | 1.32241300  | 0.53904000  |
| C     | 5.74332000  | -0.30815300 | -0.42772500 |
| C     | 5.25606800  | 2.23459200  | 0.74918100  |



|   |             |             |             |
|---|-------------|-------------|-------------|
| C | 2.86455900  | 1.75095600  | 0.67128600  |
| C | 6.82932600  | 0.57578400  | -0.23485500 |
| C | 5.90412100  | -1.45333100 | -1.22729700 |
| C | 4.93111600  | 3.57021900  | 1.01449300  |
| C | 2.57464100  | 3.08210000  | 0.96702500  |
| H | 2.04940900  | 1.04925600  | 0.53887000  |
| C | 8.02202900  | 0.31186600  | -0.91877100 |
| C | 7.11509300  | -1.70401700 | -1.87077200 |
| H | 5.08340700  | -2.14901200 | -1.35676900 |
| C | 3.60789500  | 4.00502600  | 1.12184500  |
| H | 5.72582800  | 4.29334300  | 1.16155200  |
| H | 1.53720900  | 3.39141100  | 1.06500700  |
| H | 8.86397400  | 0.98536900  | -0.80211900 |
| C | 8.17682500  | -0.81096500 | -1.73526700 |
| H | 7.21602200  | -2.59445700 | -2.48588300 |
| C | -4.32083200 | 1.24916500  | -0.73243000 |
| C | -5.59660900 | -0.34222300 | 0.61998300  |
| C | -5.42498500 | 2.13010500  | -0.77609700 |
| C | -3.05302900 | 1.68984100  | -1.15065500 |
| C | -6.72217100 | 0.51201400  | 0.59996800  |
| C | -5.55978800 | -1.43635300 | 1.50166900  |
| C | -5.19577100 | 3.45236300  | -1.17470700 |
| C | -2.86405800 | 3.00537300  | -1.57189000 |
| H | -2.20782900 | 1.01144200  | -1.14299300 |
| C | -7.74415400 | 0.27460200  | 1.52687000  |
| C | -6.60797400 | -1.66288200 | 2.39251200  |
| H | -4.71152000 | -2.11083800 | 1.50412900  |
| C | -3.93258100 | 3.90056700  | -1.56852400 |
| H | -6.02306700 | 4.15309200  | -1.19915100 |
| H | -1.87531200 | 3.32500200  | -1.89076100 |
| H | -8.61032800 | 0.92686900  | 1.54465200  |
| C | -7.69913000 | -0.79601800 | 2.42301800  |
| H | -6.55699000 | -2.51302200 | 3.06768700  |
| N | 4.50304200  | -0.01708900 | 0.19257700  |
| N | -4.51671200 | -0.07240800 | -0.25888600 |
| N | 1.64353500  | -1.93754900 | -1.17887100 |
| N | -1.38958000 | -1.85760200 | 0.62471500  |
| H | -3.79395800 | 4.93179700  | -1.88109400 |
| H | -8.51467000 | -0.95442400 | 3.12312000  |
| H | 9.12040100  | -0.98849900 | -2.24373700 |
| H | 3.39338400  | 5.04777900  | 1.33880600  |
| C | 6.69164200  | 1.69999000  | 0.79789700  |
| C | -6.82580900 | 1.57102200  | -0.50339900 |
| C | 7.73516700  | 2.81299500  | 0.59005600  |
| H | 7.64505300  | 3.58041600  | 1.36454700  |
| H | 8.75066900  | 2.41461100  | 0.67321500  |

|   |           |           |           |
|---|-----------|-----------|-----------|
| H | 7.63043   | 3.294208  | -0.388959 |
| C | 6.92617   | 1.083919  | 2.21136   |
| H | 7.9376    | 0.665634  | 2.279601  |
| H | 6.81018   | 1.853119  | 2.984353  |
| H | 6.211378  | 0.281509  | 2.419868  |
| C | -7.837228 | 2.678501  | -0.154938 |
| H | -7.925051 | 3.397208  | -0.975082 |
| H | -8.837319 | 2.25986   | -0.008616 |
| H | -7.55236  | 3.22161   | 0.753262  |
| C | -7.321145 | 0.863705  | -1.802104 |
| H | -8.313434 | 0.425834  | -1.640376 |
| H | -7.384217 | 1.584475  | -2.626202 |
| H | -6.64012  | 0.06117   | -2.102969 |
| O | -0.039397 | -4.748092 | 0.911067  |

### DMAC-Ph-SO<sub>2</sub>

| Atoms | x           | y           | z           |
|-------|-------------|-------------|-------------|
| C     | 3.09181500  | -1.18922400 | -1.13893100 |
| C     | 1.97949500  | -2.03041600 | -1.13501600 |
| C     | 1.43320200  | -2.42865100 | 0.08822500  |
| C     | 1.98355600  | -2.01004000 | 1.30092800  |
| C     | 3.09690900  | -1.16748900 | 1.28559600  |
| C     | 3.65071800  | -0.75277700 | 0.07029400  |
| H     | 3.53776200  | -0.87333500 | -2.07763400 |
| H     | 1.55412500  | -2.39450900 | -2.06480700 |
| H     | 1.56153600  | -2.35726100 | 2.23857400  |
| H     | 3.54845400  | -0.83318400 | 2.21491900  |
| S     | -0.00000100 | -3.52877700 | 0.10012000  |
| C     | -1.43321500 | -2.42866300 | 0.08824400  |
| C     | -1.97951500 | -2.03041600 | -1.13498900 |
| C     | -1.98356600 | -2.01007100 | 1.30095500  |
| C     | -3.09184000 | -1.18922900 | -1.13888700 |
| H     | -1.55414400 | -2.39449100 | -2.06478600 |
| C     | -3.09692800 | -1.16753200 | 1.28564000  |
| H     | -1.56153800 | -2.35729900 | 2.23859600  |
| C     | -3.65074500 | -0.75281100 | 0.07034600  |
| H     | -3.53778600 | -0.87332000 | -2.07758400 |
| H     | -3.54847100 | -0.83324400 | 2.21497100  |
| O     | -0.00000700 | -4.25903600 | -1.17974000 |
| O     | 0.00001100  | -4.23120600 | 1.39531000  |
| C     | -6.08350600 | -0.46400900 | -0.09275200 |
| C     | -4.62039400 | 1.49387700  | -0.14367100 |
| C     | -7.22335700 | 0.36314000  | 0.02735700  |
| C     | -6.23555800 | -1.83093800 | -0.38478100 |
| C     | -5.73443400 | 2.35633600  | -0.02524800 |

|   |             |             |             |
|---|-------------|-------------|-------------|
| C | -3.36049700 | 2.01874000  | -0.48221800 |
| C | -8.47799700 | -0.20461300 | -0.22436000 |
| C | -7.50196000 | -2.37238000 | -0.60043800 |
| H | -5.36662000 | -2.47484500 | -0.45265200 |
| C | -5.55321100 | 3.71123100  | -0.32688800 |
| C | -3.20708700 | 3.37881300  | -0.74704900 |
| H | -2.49827700 | 1.36567800  | -0.54831600 |
| C | -8.63088200 | -1.55682400 | -0.53993100 |
| H | -9.36652900 | 0.41346100  | -0.15659500 |
| H | -7.59585200 | -3.43133400 | -0.82673100 |
| H | -6.39689900 | 4.38947300  | -0.26153900 |
| C | -4.30843800 | 4.23136800  | -0.68966300 |
| H | -2.22435300 | 3.76231800  | -1.00944300 |
| C | 4.62042200  | 1.49389300  | -0.14387300 |
| C | 6.08348300  | -0.46402600 | -0.09267900 |
| C | 5.73446200  | 2.35633400  | -0.02541500 |
| C | 3.36056200  | 2.01875000  | -0.48257200 |
| C | 7.22334400  | 0.36310600  | 0.02745200  |
| C | 6.23551700  | -1.83098100 | -0.38459500 |
| C | 5.55328100  | 3.71122000  | -0.32714300 |
| C | 3.20719200  | 3.37880600  | -0.74750000 |
| H | 2.49834300  | 1.36569200  | -0.54870100 |
| C | 8.47798800  | -0.20470400 | -0.22412700 |
| C | 7.50192100  | -2.37247700 | -0.60010800 |
| H | 5.36656500  | -2.47486500 | -0.45249200 |
| C | 4.30855100  | 4.23135300  | -0.69005400 |
| H | 6.39697000  | 4.38945700  | -0.26175800 |
| H | 2.22449000  | 3.76230700  | -1.01002000 |
| H | 9.36653400  | 0.41334800  | -0.15635000 |
| C | 8.63086100  | -1.55694700 | -0.53957200 |
| H | 7.59580400  | -3.43145100 | -0.82631300 |
| N | -4.79892900 | 0.10771800  | 0.08232100  |
| N | 4.79890500  | 0.10774500  | 0.08226100  |
| H | 9.62138400  | -1.96521400 | -0.72008600 |
| H | 4.20371400  | 5.29036400  | -0.90891100 |
| H | -4.20356700 | 5.29038800  | -0.90846300 |
| H | -9.621402   | -1.96505    | -0.720554   |
| C | -7.043979   | 1.796044    | 0.540619    |
| C | 7.043959    | 1.796063    | 0.540576    |
| C | 6.908321    | 1.736487    | 2.093212    |
| H | 7.818045    | 1.314792    | 2.537267    |
| H | 6.752241    | 2.743242    | 2.499153    |
| H | 6.061311    | 1.112407    | 2.395514    |
| C | 8.25256     | 2.689998    | 0.207348    |
| H | 8.120082    | 3.693852    | 0.621649    |
| H | 9.166392    | 2.292647    | 0.658848    |

|   |           |          |           |
|---|-----------|----------|-----------|
| H | 8.410066  | 2.778733 | -0.873537 |
| C | -6.908426 | 1.736329 | 2.093259  |
| H | -6.752386 | 2.743051 | 2.4993    |
| H | -7.818163 | 1.314581 | 2.537236  |
| H | -6.061422 | 1.112243 | 2.395563  |
| C | -8.252545 | 2.69002  | 0.207408  |
| H | -9.166413 | 2.292638 | 0.658814  |
| H | -8.120076 | 3.693833 | 0.621811  |
| H | -8.409998 | 2.778867 | -0.873477 |

### DMAC-3Py-SO<sub>2</sub>

| Atoms | x           | y           | z           |
|-------|-------------|-------------|-------------|
| C     | 3.15240600  | -1.21310200 | -1.30747000 |
| C     | 1.43104800  | -2.40649900 | -0.16257300 |
| C     | 1.96021300  | -1.94217800 | 1.04533600  |
| C     | 3.60509200  | -0.78149800 | -0.05365400 |
| H     | 3.67519000  | -0.90163400 | -2.20602600 |
| H     | 1.52262600  | -2.23848500 | 1.99498200  |
| S     | -0.00026900 | -3.50450500 | -0.16244800 |
| C     | -1.43130300 | -2.40616300 | -0.16142200 |
| C     | -1.96275400 | -1.94635400 | 1.04719800  |
| C     | -3.14981200 | -1.20760300 | -1.30520200 |
| H     | -1.52710400 | -2.24650100 | 1.99651900  |
| C     | -3.60510700 | -0.78097700 | -0.05060700 |
| H     | -3.67051700 | -0.89226400 | -2.20361500 |
| O     | -0.00074800 | -4.20950300 | -1.45529800 |
| O     | 0.00005400  | -4.22040300 | 1.12195800  |
| C     | 2.03785500  | -2.04537200 | -1.36649900 |
| C     | -2.03552800 | -2.04013500 | -1.36518200 |
| N     | -3.03031100 | -1.14254300 | 1.10159500  |
| N     | 3.02770900  | -1.13826300 | 1.09877700  |
| H     | 1.65926500  | -2.42410000 | -2.31096600 |
| H     | -1.65516700 | -2.41518800 | -2.31040700 |
| C     | -6.02542000 | -0.49883900 | 0.14256500  |
| C     | -4.55125700 | 1.47144500  | 0.00448500  |
| C     | -7.17548800 | 0.31661800  | 0.14200400  |
| C     | -6.15910700 | -1.89796000 | 0.24902500  |
| C     | -5.65835100 | 2.34482300  | -0.00064300 |
| C     | -3.24429300 | 1.99925000  | -0.02143300 |
| C     | -8.42388300 | -0.31600900 | 0.23438200  |
| C     | -7.10929600 | 1.84631100  | 0.03730600  |
| C     | -7.41382700 | -2.49190300 | 0.33943900  |
| H     | -5.27765300 | -2.52804500 | 0.27492700  |
| C     | -5.40235800 | 3.72287800  | -0.04919900 |
| C     | -3.02730500 | 3.37254500  | -0.06868400 |
| H     | -2.38981900 | 1.33312700  | 0.00950900  |
| C     | -8.56237800 | -1.69970500 | 0.32946900  |

|   |             |             |             |
|---|-------------|-------------|-------------|
| H | -9.32228300 | 0.29462300  | 0.22987500  |
| H | -7.48648400 | -3.57311800 | 0.42274500  |
| H | -6.24234600 | 4.41152200  | -0.05991300 |
| C | -4.11227500 | 4.24955500  | -0.08676000 |
| H | -2.00857400 | 3.75123200  | -0.08506100 |
| H | -9.54952000 | -2.14784300 | 0.39871700  |
| H | -3.96025200 | 5.32451700  | -0.12407500 |
| C | 4.55194400  | 1.47083100  | -0.01233200 |
| C | 6.02452100  | -0.49876300 | 0.15047500  |
| C | 5.65937100  | 2.34378800  | -0.01825800 |
| C | 3.24534600  | 1.99888100  | -0.04983600 |
| C | 7.17483400  | 0.31633800  | 0.15032600  |
| C | 6.15715700  | -1.89709500 | 0.26793700  |
| C | 5.40419900  | 3.72146600  | -0.07993800 |
| C | 7.10984800  | 1.84517000  | 0.03306000  |
| C | 3.02916100  | 3.37180300  | -0.10994200 |
| H | 2.39044000  | 1.33333900  | -0.01801600 |
| C | 8.42246300  | -0.31589100 | 0.25501200  |
| C | 7.41113100  | -2.49065800 | 0.37034600  |
| H | 5.27539900  | -2.52676600 | 0.29301200  |
| C | 4.11456000  | 4.24825000  | -0.12944200 |
| H | 6.24451500  | 4.40969700  | -0.09154200 |
| H | 2.01069000  | 3.75068900  | -0.13539300 |
| H | 9.32105100  | 0.29446900  | 0.25118900  |
| C | 8.55996100  | -1.69884900 | 0.36147300  |
| H | 7.48296100  | -3.57125000 | 0.46202400  |
| H | 3.96317400  | 5.32290500  | -0.17682200 |
| H | 9.54653100  | -2.14670700 | 0.44007500  |
| N | -4.74388800 | 0.07647000  | 0.02577400  |
| N | 4.74386500  | 0.07603200  | 0.02178000  |
| C | 7.84325400  | 2.28559400  | -1.26467700 |
| H | 8.88955     | 1.961376    | -1.25409    |
| H | 7.362577    | 1.85237     | -2.148692   |
| H | 7.832126    | 3.375768    | -1.371984   |
| C | 7.820162    | 2.478454    | 1.261814    |
| H | 7.321328    | 2.183472    | 2.191089    |
| H | 8.866113    | 2.160069    | 1.321014    |
| H | 7.812318    | 3.571831    | 1.203137    |
| C | -7.834054   | 2.297289    | -1.261662   |
| H | -8.880462   | 1.973247    | -1.260542   |
| H | -7.821978   | 3.388286    | -1.360162   |
| H | -7.347653   | 1.871027    | -2.145932   |
| C | -7.827441   | 2.470059    | 1.266373    |
| H | -7.334791   | 2.167511    | 2.196514    |
| H | -7.81888    | 3.563859    | 1.216448    |
| H | -8.873864   | 2.151638    | 1.316197    |
| C | 3.15240600  | -1.21310200 | -1.30747000 |

DMAC-2Py-SO<sub>2</sub>

| Atoms | x           | y           | z           |
|-------|-------------|-------------|-------------|
| C     | -2.94157300 | -1.28915100 | 0.89626600  |
| C     | -1.48080300 | -2.34664100 | -0.48550400 |
| C     | -2.06707400 | -1.83676300 | -1.64380700 |
| C     | -3.16496800 | -0.98998400 | -1.47920800 |
| C     | -3.61345800 | -0.70420100 | -0.18875500 |
| H     | -3.27227700 | -1.09214100 | 1.91366100  |
| H     | -1.68889100 | -2.10676100 | -2.62361200 |
| H     | -3.67504200 | -0.55762200 | -2.33523200 |
| S     | -0.05132400 | -3.47706300 | -0.65826800 |
| C     | 1.41097100  | -2.38007400 | -0.56583900 |
| C     | 2.43521900  | -2.56465500 | -1.49314600 |
| C     | 2.51324500  | -0.73040900 | 0.54605600  |
| C     | 3.57092300  | -1.76542900 | -1.34910800 |
| H     | 2.33740100  | -3.29649300 | -2.28758600 |
| C     | 3.61818600  | -0.83062600 | -0.31318400 |
| H     | 2.51578000  | -0.00584700 | 1.35734500  |
| H     | 4.41234100  | -1.85708000 | -2.03000200 |
| O     | -0.02103300 | -4.39615500 | 0.48322200  |
| O     | -0.08437700 | -3.98480200 | -2.04569900 |
| C     | 5.73213900  | -0.34864400 | 0.83631400  |
| C     | 4.73484200  | 1.32990300  | -0.63982500 |
| C     | 6.92829800  | 0.39926300  | 0.91299100  |
| C     | 5.51173200  | -1.41727800 | 1.72209600  |
| C     | 5.91441600  | 2.10656700  | -0.58741900 |
| C     | 3.55617300  | 1.87741900  | -1.17555300 |
| C     | 7.83473300  | 0.08607900  | 1.93292500  |
| C     | 6.44850300  | -1.72297600 | 2.70837600  |
| H     | 4.60674100  | -2.00965400 | 1.65361700  |
| C     | 5.84399600  | 3.43826600  | -1.01315200 |
| C     | 3.52689300  | 3.19876900  | -1.61948900 |
| H     | 2.65503900  | 1.27877800  | -1.24071800 |
| C     | 7.60854900  | -0.95992600 | 2.83074800  |
| H     | 8.75225600  | 0.65673700  | 2.02519800  |
| H     | 6.25681700  | -2.55179600 | 3.38469000  |
| H     | 6.73064900  | 4.06080600  | -0.96581800 |
| C     | 4.66794200  | 3.99349500  | -1.52336900 |
| H     | 2.60420800  | 3.60258800  | -2.02817900 |
| C     | -4.50594700 | 1.51371600  | 0.36789500  |
| C     | -6.01319000 | -0.40964400 | 0.23559800  |
| C     | -5.60663300 | 2.39846200  | 0.42108700  |
| C     | -3.21428500 | 1.97880200  | 0.66955200  |
| C     | -7.13901500 | 0.44254300  | 0.28655400  |
| C     | -6.16999700 | -1.79513300 | 0.41128600  |
| C     | -5.37461400 | 3.71136000  | 0.84783400  |

|   |             |             |             |
|---|-------------|-------------|-------------|
| C | -3.01225800 | 3.30114100  | 1.06260700  |
| H | -2.36345400 | 1.30996900  | 0.61101600  |
| C | -8.38214600 | -0.12820100 | 0.58429900  |
| C | -7.42715200 | -2.33638300 | 0.67658300  |
| H | -5.31293600 | -2.45597700 | 0.35257700  |
| C | -4.09578000 | 4.17129500  | 1.17146600  |
| H | -6.20546100 | 4.40502200  | 0.91548600  |
| H | -2.00579800 | 3.63874400  | 1.29600800  |
| H | -9.25933600 | 0.50630700  | 0.64767000  |
| C | -8.53888200 | -1.50215900 | 0.78245100  |
| H | -7.52572200 | -3.41015600 | 0.81239900  |
| N | 4.76706800  | 0.00299700  | -0.14252500 |
| N | -4.73418300 | 0.16076300  | 0.01127700  |
| N | 1.42549600  | -1.49705400 | 0.42620600  |
| N | -1.88869900 | -2.09771900 | 0.75202300  |
| H | -3.95207200 | 5.19951600  | 1.49153900  |
| H | -9.52068500 | -1.91146000 | 1.00345600  |
| H | 4.65302100  | 5.02865000  | -1.85279400 |
| H | 8.33848500  | -1.18003200 | 3.60472100  |
| C | 7.22787400  | 1.42687100  | -0.18424200 |
| C | -6.965895   | 1.916241    | -0.098254   |
| C | 8.301036    | 2.443225    | 0.247157    |
| H | 9.240815    | 1.937503    | 0.487591    |
| H | 8.528672    | 3.137815    | -0.566843   |
| H | 7.986342    | 3.024297    | 1.121366    |
| C | 7.771376    | 0.657621    | -1.427289   |
| H | 7.974986    | 1.356977    | -2.247049   |
| H | 8.7004      | 0.13383     | -1.172371   |
| H | 7.049615    | -0.084168   | -1.783866   |
| C | -8.126983   | 2.791025    | 0.408914    |
| H | -8.002698   | 3.828507    | 0.084693    |
| H | -9.079644   | 2.453152    | -0.00956    |
| H | -8.203535   | 2.775931    | 1.501983    |
| C | -6.945096   | 2.007353    | -1.65502    |
| H | -7.894118   | 1.645642    | -2.068563   |
| H | -6.796101   | 3.046524    | -1.972059   |
| H | -6.1369     | 1.402826    | -2.078903   |

#### DPA-Ph-SO

| Atoms | x           | y           | z           |
|-------|-------------|-------------|-------------|
| C     | -3.02868300 | -1.53098800 | 0.44514400  |
| C     | -1.94541400 | -2.27771700 | -0.01205400 |
| C     | -1.37284300 | -1.98173600 | -1.24929800 |
| C     | -1.90536400 | -0.96879400 | -2.04924600 |
| C     | -2.99506100 | -0.22687800 | -1.59732000 |

|   |             |             |             |
|---|-------------|-------------|-------------|
| C | -3.56768200 | -0.49321000 | -0.33931700 |
| H | -3.46599700 | -1.75226800 | 1.41379600  |
| H | -1.53944700 | -3.09208000 | 0.58191100  |
| H | -1.49002000 | -0.76439100 | -3.03388600 |
| H | -3.41607200 | 0.55278500  | -2.22432300 |
| S | 0.02354900  | -2.99010800 | -1.85599700 |
| C | 1.40132800  | -1.95645800 | -1.24206900 |
| C | 2.06373600  | -2.33659300 | -0.07554100 |
| C | 1.83273700  | -0.84498600 | -1.96951200 |
| C | 3.13768600  | -1.57887500 | 0.38846200  |
| H | 1.73150400  | -3.22241200 | 0.45896600  |
| C | 2.91241600  | -0.09286200 | -1.51217000 |
| H | 1.34398400  | -0.56707000 | -2.90094200 |
| C | 3.57603300  | -0.44593900 | -0.32155200 |
| H | 3.64517800  | -1.86657500 | 1.30404500  |
| H | 3.25423800  | 0.76531000  | -2.08235000 |
| C | 5.79760500  | -0.32403900 | 0.73767100  |
| C | 4.66157800  | 1.73802700  | 0.01930300  |
| C | 6.37330900  | 0.19254100  | 1.90974100  |
| C | 6.34923200  | -1.47752200 | 0.15650000  |
| C | 5.80780600  | 2.42332300  | -0.41582000 |
| C | 3.50740800  | 2.47275300  | 0.33807200  |
| C | 7.48289800  | -0.43087400 | 2.48240400  |
| C | 7.44811100  | -2.10494600 | 0.74481300  |
| H | 5.91328500  | -1.87921000 | -0.75350000 |
| C | 5.79797200  | 3.81475000  | -0.52299500 |
| C | 3.50047500  | 3.86248800  | 0.21228200  |
| H | 2.62026400  | 1.95058900  | 0.68430200  |
| C | 8.02453800  | -1.58477600 | 1.90783300  |
| H | 7.91663600  | -0.01812500 | 3.38988300  |
| H | 7.86202500  | -2.99778500 | 0.28285300  |
| H | 6.69407100  | 4.32923000  | -0.86112800 |
| C | 4.64488400  | 4.54320900  | -0.21493200 |
| H | 2.59911100  | 4.41582800  | 0.46435400  |
| H | 8.88404600  | -2.07209000 | 2.35996700  |
| H | 4.63857500  | 5.62605000  | -0.30496200 |
| C | -4.75686100 | 1.65554700  | -0.15132500 |
| C | -5.71982700 | -0.37328500 | 0.85486500  |
| C | -5.96761200 | 2.22602700  | -0.57685500 |
| C | -3.63265900 | 2.48220100  | 0.01052200  |
| C | -6.24384800 | 0.23237100  | 2.00825200  |
| C | -6.24483400 | -1.60484800 | 0.43073900  |
| C | -6.05001100 | 3.59623800  | -0.82887600 |
| C | -3.71886400 | 3.84849000  | -0.25972000 |
| H | -2.69544900 | 2.04964400  | 0.34831900  |
| C | -7.27712200 | -0.38164500 | 2.71755500  |



|   |             |             |             |
|---|-------------|-------------|-------------|
| C | -7.26622100 | -2.22082700 | 1.15515800  |
| H | -5.84903100 | -2.07591400 | -0.46423700 |
| C | -4.92711900 | 4.41546100  | -0.67722100 |
| H | -6.99512800 | 4.02151600  | -1.15732000 |
| H | -2.83935300 | 4.47417200  | -0.12881700 |
| H | -7.67177200 | 0.10036600  | 3.60856500  |
| C | -7.79156800 | -1.61278500 | 2.29958400  |
| H | -7.66052900 | -3.17483300 | 0.81419400  |
| H | -4.99289100 | 5.48092500  | -0.88005200 |
| H | -8.59117000 | -2.09194700 | 2.85788100  |
| N | 4.67326700  | 0.31931600  | 0.14328300  |
| N | -4.67415900 | 0.25981300  | 0.12121800  |
| H | 6.70310700  | 1.86177500  | -0.66567900 |
| H | 5.94952700  | 1.08232200  | 2.36597100  |
| H | -6.84031000 | 1.59267200  | -0.70563300 |
| H | -5.840104   | 1.183494    | 2.34268     |
| O | 0.039027    | -4.255154   | -1.011108   |

#### DPA-2Py-SO

| Atoms | x           | y           | z           |
|-------|-------------|-------------|-------------|
| C     | 3.48590000  | -1.28733900 | 1.40816700  |
| C     | 1.39865800  | -0.42276600 | 2.23597100  |
| C     | 1.59439600  | 0.68934900  | 1.41179000  |
| C     | 3.57990200  | -0.14048200 | 0.58593400  |
| H     | 4.26866900  | -2.03683000 | 1.40787900  |
| H     | 0.87096200  | 1.50212100  | 1.40101400  |
| S     | 0.00314200  | -0.54452800 | 3.38949000  |
| C     | -1.35525400 | -0.43798800 | 2.18175900  |
| C     | -2.25074500 | 0.62668700  | 2.24986400  |
| C     | -2.68340900 | -1.33707900 | 0.39425800  |
| H     | -2.10331800 | 1.41328200  | 2.98551500  |
| C     | -3.54018700 | -0.21710400 | 0.53411600  |
| H     | -2.87073700 | -2.08697400 | -0.36564700 |
| O     | -0.06156000 | 0.73617800  | 4.20628500  |
| C     | -5.27658900 | -1.18051800 | -0.91944700 |
| C     | -5.22628800 | 1.24157800  | -0.51526500 |
| C     | -5.53264800 | -1.16608800 | -2.29831400 |
| C     | -5.66157700 | -2.29539900 | -0.15945000 |
| C     | -6.60767800 | 1.42419100  | -0.37626900 |
| C     | -4.42258200 | 2.32143200  | -0.90531100 |
| C     | -6.16194300 | -2.25364300 | -2.90633900 |
| C     | -6.27662600 | -3.38656400 | -0.77598900 |
| H     | -5.48204200 | -2.29989100 | 0.91203800  |
| C     | -7.17899500 | 2.67342300  | -0.62796200 |
| C     | -4.99685200 | 3.57009000  | -1.14223300 |
| H     | -3.35139700 | 2.18264300  | -1.01258600 |

|   |             |             |             |
|---|-------------|-------------|-------------|
| C | -6.53191400 | -3.37060100 | -2.15076000 |
| H | -6.35604500 | -2.22977300 | -3.97565500 |
| H | -6.57136000 | -4.24379400 | -0.17589800 |
| H | -8.25251000 | 2.80271000  | -0.51553600 |
| C | -6.37728900 | 3.75258200  | -1.00831300 |
| H | -4.36303200 | 4.40155500  | -1.43995100 |
| H | -7.01826700 | -4.21759700 | -2.62711000 |
| H | -6.82190200 | 4.72592100  | -1.19794400 |
| C | 5.46247800  | -1.05540100 | -0.70459700 |
| C | 5.01301700  | 1.35803800  | -0.74834600 |
| C | 6.85323700  | -1.02474400 | -0.53209300 |
| C | 4.86830200  | -2.16161900 | -1.32940200 |
| C | 5.24339300  | 1.55646200  | -2.11509300 |
| C | 5.16806800  | 2.42877600  | 0.14221900  |
| C | 7.63782900  | -2.09050000 | -0.97671200 |
| C | 5.65643300  | -3.23089600 | -1.75900200 |
| H | 3.79230900  | -2.17663700 | -1.47935000 |
| C | 5.62717800  | 2.81396700  | -2.58606400 |
| C | 5.53922500  | 3.68544900  | -0.33565900 |
| H | 4.98896400  | 2.27765500  | 1.20193000  |
| C | 7.04385200  | -3.19956200 | -1.58672700 |
| H | 8.71541100  | -2.05579700 | -0.83855700 |
| H | 5.18560600  | -4.08280300 | -2.24305100 |
| H | 5.80293400  | 2.95600300  | -3.64938600 |
| C | 5.77338700  | 3.88449100  | -1.70031200 |
| H | 5.65262400  | 4.51012500  | 0.36334400  |
| H | 7.65626800  | -4.02955800 | -1.92856100 |
| H | 6.06687000  | 4.86407500  | -2.06810900 |
| N | -4.65393700 | -0.05452100 | -0.29704100 |
| N | 4.66387600  | 0.05068200  | -0.27126100 |
| C | 2.38189500  | -1.41809100 | 2.23875400  |
| C | -1.59019200 | -1.44545900 | 1.23724800  |
| N | -3.31724900 | 0.73856500  | 1.44815100  |
| N | 2.64334300  | 0.82793100  | 0.60306200  |
| H | -7.23060600 | 0.58826500  | -0.07160200 |
| H | -5.24208900 | -0.29908100 | -2.88444800 |
| H | 7.31191800  | -0.16301900 | -0.05592300 |
| H | 5.12289300  | 0.72627600  | -2.80500900 |
| H | 2.29354400  | -2.28011300 | 2.89668200  |
| H | -0.91397500 | -2.29236800 | 1.14088500  |

### DPA-3Py-SO

| Atoms | x          | y           | z          |
|-------|------------|-------------|------------|
| C     | 3.48590000 | -1.28733900 | 1.40816700 |
| C     | 1.39865800 | -0.42276600 | 2.23597100 |
| C     | 1.59439600 | 0.68934900  | 1.41179000 |
| C     | 3.57990200 | -0.14048200 | 0.58593400 |

|   |             |             |             |
|---|-------------|-------------|-------------|
| H | 4.26866900  | -2.03683000 | 1.40787900  |
| H | 0.87096200  | 1.50212100  | 1.40101400  |
| S | 0.00314200  | -0.54452800 | 3.38949000  |
| C | -1.35525400 | -0.43798800 | 2.18175900  |
| C | -2.25074500 | 0.62668700  | 2.24986400  |
| C | -2.68340900 | -1.33707900 | 0.39425800  |
| H | -2.10331800 | 1.41328200  | 2.98551500  |
| C | -3.54018700 | -0.21710400 | 0.53411600  |
| H | -2.87073700 | -2.08697400 | -0.36564700 |
| O | -0.06156000 | 0.73617800  | 4.20628500  |
| C | -5.27658900 | -1.18051800 | -0.91944700 |
| C | -5.22628800 | 1.24157800  | -0.51526500 |
| C | -5.53264800 | -1.16608800 | -2.29831400 |
| C | -5.66157700 | -2.29539900 | -0.15945000 |
| C | -6.60767800 | 1.42419100  | -0.37626900 |
| C | -4.42258200 | 2.32143200  | -0.90531100 |
| C | -6.16194300 | -2.25364300 | -2.90633900 |
| C | -6.27662600 | -3.38656400 | -0.77598900 |
| H | -5.48204200 | -2.29989100 | 0.91203800  |
| C | -7.17899500 | 2.67342300  | -0.62796200 |
| C | -4.99685200 | 3.57009000  | -1.14223300 |
| H | -3.35139700 | 2.18264300  | -1.01258600 |
| C | -6.53191400 | -3.37060100 | -2.15076000 |
| H | -6.35604500 | -2.22977300 | -3.97565500 |
| H | -6.57136000 | -4.24379400 | -0.17589800 |
| H | -8.25251000 | 2.80271000  | -0.51553600 |
| C | -6.37728900 | 3.75258200  | -1.00831300 |
| H | -4.36303200 | 4.40155500  | -1.43995100 |
| H | -7.01826700 | -4.21759700 | -2.62711000 |
| H | -6.82190200 | 4.72592100  | -1.19794400 |
| C | 5.46247800  | -1.05540100 | -0.70459700 |
| C | 5.01301700  | 1.35803800  | -0.74834600 |
| C | 6.85323700  | -1.02474400 | -0.53209300 |
| C | 4.86830200  | -2.16161900 | -1.32940200 |
| C | 5.24339300  | 1.55646200  | -2.11509300 |
| C | 5.16806800  | 2.42877600  | 0.14221900  |
| C | 7.63782900  | -2.09050000 | -0.97671200 |
| C | 5.65643300  | -3.23089600 | -1.75900200 |
| H | 3.79230900  | -2.17663700 | -1.47935000 |
| C | 5.62717800  | 2.81396700  | -2.58606400 |
| C | 5.53922500  | 3.68544900  | -0.33565900 |
| H | 4.98896400  | 2.27765500  | 1.20193000  |
| C | 7.04385200  | -3.19956200 | -1.58672700 |
| H | 8.71541100  | -2.05579700 | -0.83855700 |
| H | 5.18560600  | -4.08280300 | -2.24305100 |
| H | 5.80293400  | 2.95600300  | -3.64938600 |
| C | 5.77338700  | 3.88449100  | -1.70031200 |
| H | 5.65262400  | 4.51012500  | 0.36334400  |

|   |             |             |             |
|---|-------------|-------------|-------------|
| H | 7.65626800  | -4.02955800 | -1.92856100 |
| H | 6.06687000  | 4.86407500  | -2.06810900 |
| N | -4.65393700 | -0.05452100 | -0.29704100 |
| N | 4.66387600  | 0.05068200  | -0.27126100 |
| C | 2.38189500  | -1.41809100 | 2.23875400  |
| C | -1.59019200 | -1.44545900 | 1.23724800  |
| N | -3.31724900 | 0.73856500  | 1.44815100  |
| N | 2.64334300  | 0.82793100  | 0.60306200  |
| H | -7.23060600 | 0.58826500  | -0.07160200 |
| H | -5.24208900 | -0.29908100 | -2.88444800 |
| H | 7.31191800  | -0.16301900 | -0.05592300 |
| H | 5.12289300  | 0.72627600  | -2.80500900 |
| H | 2.29354400  | -2.28011300 | 2.89668200  |
| H | -0.91397500 | -2.29236800 | 1.14088500  |

### DPA-2Py-SO

| Atoms | x           | y           | z           |
|-------|-------------|-------------|-------------|
| C     | -3.13800600 | -1.08355400 | -1.58248600 |
| C     | -2.03549200 | -1.89672100 | -1.82958000 |
| C     | -1.28432800 | -2.31126600 | -0.73353200 |
| C     | -2.60077100 | -1.20251300 | 0.76058600  |
| C     | -3.44167400 | -0.71486200 | -0.26066100 |
| H     | -3.75943800 | -0.73225000 | -2.40077000 |
| H     | -1.75253400 | -2.21276000 | -2.82876600 |
| H     | -2.79775000 | -0.94783400 | 1.79875900  |
| S     | 0.14017500  | -3.43110600 | -0.99362200 |
| C     | 1.45278300  | -2.21650300 | -0.56404200 |
| C     | 2.47035800  | -2.62867400 | 0.29621100  |
| C     | 3.50836200  | -1.74028600 | 0.56785800  |
| H     | 2.44624000  | -3.61381100 | 0.75339300  |
| C     | 2.42186400  | -0.17591300 | -0.90098100 |
| C     | 3.50182800  | -0.47393500 | -0.03851600 |
| H     | 4.31355200  | -2.02080800 | 1.23965100  |
| H     | 2.37288900  | 0.79054900  | -1.39629600 |
| O     | 0.20299800  | -3.69567100 | -2.49016500 |
| C     | 5.86878900  | 0.03448500  | 0.39390000  |
| C     | 4.22027200  | 1.86031700  | 0.25734900  |
| C     | 6.63086500  | 0.56417300  | 1.44658600  |
| C     | 6.44695400  | -0.91649700 | -0.46189500 |
| C     | 5.03113800  | 2.79156000  | -0.40975500 |
| C     | 3.11925200  | 2.31573500  | 0.99974500  |
| C     | 7.95077500  | 0.15060400  | 1.63448600  |
| C     | 7.76170100  | -1.33731700 | -0.25712600 |
| H     | 5.86571700  | -1.32055500 | -1.28583300 |
| C     | 4.74445900  | 4.15503900  | -0.33070400 |
| C     | 2.82890300  | 3.67960800  | 1.05927600  |
| H     | 2.49464500  | 1.60077900  | 1.52764900  |

|   |             |             |             |
|---|-------------|-------------|-------------|
| C | 8.52216500  | -0.80480700 | 0.78870300  |
| H | 8.52952400  | 0.57004400  | 2.45355400  |
| H | 8.19626100  | -2.07393400 | -0.92810400 |
| H | 5.38088000  | 4.86490400  | -0.85297200 |
| C | 3.64037300  | 4.60699200  | 0.39868800  |
| H | 1.97225500  | 4.01747200  | 1.63697800  |
| H | 9.54790500  | -1.12913400 | 0.94112800  |
| H | 3.41589900  | 5.66872900  | 0.45258900  |
| C | -5.33162600 | -0.14349400 | 1.20689000  |
| C | -4.88693900 | 1.19695600  | -0.81396800 |
| C | -5.72781100 | 0.91383800  | 2.04154200  |
| C | -5.72550100 | -1.45276400 | 1.52731600  |
| C | -6.22816700 | 1.43821100  | -1.15271400 |
| C | -3.88905100 | 2.04027400  | -1.32932000 |
| C | -6.50684400 | 0.66284000  | 3.17180500  |
| C | -6.48978500 | -1.69742800 | 2.66911000  |
| H | -5.43151800 | -2.27466500 | 0.88092200  |
| C | -6.56143500 | 2.50713800  | -1.98575000 |
| C | -4.22924000 | 3.09628700  | -2.17589900 |
| H | -2.84995700 | 1.86498600  | -1.06625400 |
| C | -6.88838700 | -0.64277800 | 3.49601000  |
| H | -6.80523100 | 1.49221100  | 3.80824100  |
| H | -6.78505600 | -2.71694600 | 2.90398700  |
| H | -7.60452300 | 2.68018600  | -2.23859600 |
| C | -5.56592200 | 3.33964100  | -2.50627100 |
| H | -3.44442800 | 3.73843700  | -2.56776200 |
| H | -7.48895500 | -0.83567500 | 4.38071600  |
| H | -5.82806800 | 4.16645800  | -3.16067600 |
| N | 4.52358700  | 0.46695300  | 0.19001000  |
| N | -4.54477000 | 0.11245900  | 0.04555200  |
| H | 5.88301600  | 2.44251100  | -0.98588100 |
| H | 6.18704700  | 1.29999700  | 2.11072800  |
| H | -5.42451700 | 1.92816200  | 1.79949800  |
| H | -7.00422100 | 0.78775500  | -0.76037000 |
| N | -1.55179800 | -1.99500300 | 0.52981400  |
| N | 1.42504000  | -1.02127500 | -1.15015000 |

### DPA-Ph-SO<sub>2</sub>

| Atoms | x          | y           | z           |
|-------|------------|-------------|-------------|
| C     | 3.09690400 | -1.41928200 | -0.48333900 |
| C     | 1.99197800 | -2.10938100 | 0.00543600  |
| C     | 1.43181000 | -1.74544800 | 1.23336800  |
| C     | 1.98457400 | -0.69978500 | 1.97890900  |
| C     | 3.09532500 | -0.01635600 | 1.49473800  |
| C     | 3.66669600 | -0.36092100 | 0.25287200  |
| H     | 3.52648300 | -1.70128000 | -1.43897900 |
| H     | 1.56867200 | -2.93419200 | -0.55919500 |

|   |             |             |             |
|---|-------------|-------------|-------------|
| H | 1.56853400  | -0.44903900 | 2.94971500  |
| H | 3.53587100  | 0.78003800  | 2.08559600  |
| S | -0.00002900 | -2.63184100 | 1.86060500  |
| C | -1.43187500 | -1.74542100 | 1.23342600  |
| C | -1.99227200 | -2.10955400 | 0.00565500  |
| C | -1.98441000 | -0.69954300 | 1.97883200  |
| C | -3.09719800 | -1.41943800 | -0.48309400 |
| H | -1.56912800 | -2.93453700 | -0.55884400 |
| C | -3.09515800 | -0.01609200 | 1.49468600  |
| H | -1.56820900 | -0.44863000 | 2.94952700  |
| C | -3.66675800 | -0.36085500 | 0.25297800  |
| H | -3.52696400 | -1.70158700 | -1.43860600 |
| H | -3.53552900 | 0.78047000  | 2.08544800  |
| O | -0.00006100 | -3.96389900 | 1.22509700  |
| O | 0.00001900  | -2.47788700 | 3.32842000  |
| C | -5.78553900 | -0.34724400 | -1.00518300 |
| C | -4.96040600 | 1.72419500  | 0.02965200  |
| C | -6.27533400 | 0.22259700  | -2.19053500 |
| C | -6.29429500 | -1.58360600 | -0.57683400 |
| C | -6.20398700 | 2.21749300  | 0.45428700  |
| C | -3.89157300 | 2.61816800  | -0.14329100 |
| C | -7.26029800 | -0.43362500 | -2.93055400 |
| C | -7.26683600 | -2.24175200 | -1.33090000 |
| H | -5.92537300 | -2.02455700 | 0.34468400  |
| C | -6.37304600 | 3.58147000  | 0.69754500  |
| C | -4.06373900 | 3.97818400  | 0.11777100  |
| H | -2.93003400 | 2.24304700  | -0.48166300 |
| C | -7.75799100 | -1.67030600 | -2.50897700 |
| H | -7.63050700 | 0.01998500  | -3.84653000 |
| H | -7.65063500 | -3.19895800 | -0.98716500 |
| H | -7.34212300 | 3.94843200  | 1.02618300  |
| C | -5.30470500 | 4.46879000  | 0.53606100  |
| H | -3.22679300 | 4.65816900  | -0.02042300 |
| H | -8.52012300 | -2.18201600 | -3.09032400 |
| H | -5.43763100 | 5.52923400  | 0.73213400  |
| C | 4.96058100  | 1.72400400  | 0.02986600  |
| C | 5.78535800  | -0.34731000 | -1.00550100 |
| C | 6.20422800  | 2.21701500  | 0.45464400  |
| C | 3.89187800  | 2.61818300  | -0.14283400 |
| C | 6.27522500  | 0.22273400  | -2.19071800 |
| C | 6.29395100  | -1.58385600 | -0.57745600 |
| C | 6.37347700  | 3.58090200  | 0.69827600  |
| C | 4.06423000  | 3.97810400  | 0.11859900  |
| H | 2.93028200  | 2.24328800  | -0.48129900 |
| C | 7.26009600  | -0.43344100 | -2.93091400 |
| C | 7.26637900  | -2.24194200 | -1.33169200 |
| H | 5.92498200  | -2.02498300 | 0.34395900  |
| C | 5.30526400  | 4.46842000  | 0.53702500  |

|   |             |             |             |
|---|-------------|-------------|-------------|
| H | 7.34261100  | 3.94763600  | 1.02700200  |
| H | 3.22737400  | 4.65823700  | -0.01941100 |
| H | 7.63034800  | 0.02036400  | -3.84677600 |
| C | 7.75761400  | -1.67027800 | -2.50964200 |
| H | 7.65006000  | -3.19928700 | -0.98821200 |
| H | 5.43834600  | 5.52879000  | 0.73339100  |
| H | 8.51966900  | -2.18198300 | -3.09109400 |
| N | -4.79198200 | 0.33296400  | -0.23814100 |
| N | 4.79191900  | 0.33288000  | -0.23829600 |
| H | -7.03356100 | 1.52976600  | 0.58946200  |
| H | -5.884211   | 1.179039    | -2.52499    |
| H | 7.033717    | 1.529146    | 0.589612    |
| H | 5.884225    | 1.179309    | -2.524933   |

### DPA-3Py-SO<sub>2</sub>

| Atoms | x           | y           | z           |
|-------|-------------|-------------|-------------|
| C     | -3.08732500 | 1.72868100  | 0.05158100  |
| C     | -1.41778300 | 1.27046100  | 1.71281200  |
| C     | -2.02786800 | 0.03177000  | 1.91960600  |
| C     | -3.61992900 | 0.43921800  | 0.30340400  |
| H     | -3.55604400 | 2.39141700  | -0.66628000 |
| H     | -1.64666600 | -0.65174700 | 2.67426200  |
| S     | 0.01797300  | 1.75348900  | 2.66805000  |
| C     | 1.43867200  | 1.16635200  | 1.74967300  |
| C     | 1.94845000  | -0.11536000 | 1.96626600  |
| C     | 3.16810900  | 1.49499300  | 0.11910800  |
| H     | 1.49836200  | -0.77004800 | 2.70843900  |
| C     | 3.61971900  | 0.18223400  | 0.40664900  |
| H     | 3.66789600  | 2.10335100  | -0.62527700 |
| O     | 0.07205100  | 3.22821100  | 2.64526800  |
| O     | -0.02613500 | 0.99762200  | 3.93251600  |
| C     | 5.68857000  | 0.47261800  | -0.89133300 |
| C     | 4.93189300  | -1.78412900 | -0.28853200 |
| C     | 6.02171800  | 0.25753000  | -2.23558900 |
| C     | 6.33500300  | 1.48808500  | -0.17201000 |
| C     | 6.18256400  | -2.30325100 | 0.06618400  |
| C     | 3.91749100  | -2.65136200 | -0.71485200 |
| C     | 6.98798200  | 1.05385000  | -2.85306100 |
| C     | 7.29005300  | 2.29067600  | -0.79899700 |
| H     | 6.08924300  | 1.64268900  | 0.87496600  |
| C     | 6.41619900  | -3.67828200 | -0.00571700 |
| C     | 4.15261300  | -4.02493500 | -0.77299300 |
| H     | 2.94732400  | -2.24966100 | -0.98969900 |
| C     | 7.62206200  | 2.07607200  | -2.14027500 |
| H     | 7.24004700  | 0.87817500  | -3.89569100 |
| H     | 7.78515700  | 3.07514100  | -0.23246100 |
| H     | 7.39077700  | -4.07046300 | 0.27350100  |

|   |             |             |             |
|---|-------------|-------------|-------------|
| C | 5.40266500  | -4.54517600 | -0.42173900 |
| H | 3.35756100  | -4.68988100 | -1.10064700 |
| H | 8.37115400  | 2.69706200  | -2.62402700 |
| H | 5.58362100  | -5.61554100 | -0.47207500 |
| C | -5.11243900 | 0.53661600  | -1.64833800 |
| C | -5.53410100 | -1.10373400 | 0.12947500  |
| C | -6.41765800 | 1.01038800  | -1.83892700 |
| C | -4.19497000 | 0.59213200  | -2.70746800 |
| C | -5.84959400 | -2.18946000 | -0.69581900 |
| C | -6.03825400 | -1.05637400 | 1.43575300  |
| C | -6.79735800 | 1.53756300  | -3.07459700 |
| C | -4.57627500 | 1.13360100  | -3.93657700 |
| H | -3.18874700 | 0.20802800  | -2.56441700 |
| C | -6.66368500 | -3.21895700 | -0.21827300 |
| C | -6.84076900 | -2.09330100 | 1.91124200  |
| H | -5.79360100 | -0.21533300 | 2.07667000  |
| C | -5.87851900 | 1.60634900  | -4.12626800 |
| H | -7.81214500 | 1.90187600  | -3.21198600 |
| H | -3.85748600 | 1.17182100  | -4.75114000 |
| H | -6.90195500 | -4.05754000 | -0.86761400 |
| C | -7.15972200 | -3.17767600 | 1.08712300  |
| H | -7.22365700 | -2.04926900 | 2.92758800  |
| H | -6.17534800 | 2.02075400  | -5.08591900 |
| H | -7.78895800 | -3.98151900 | 1.45977800  |
| N | 4.71655300  | -0.36517800 | -0.25462400 |
| N | -4.73509300 | -0.02857300 | -0.38764800 |
| C | -1.97345500 | 2.13858100  | 0.76317300  |
| C | 2.07005600  | 1.98529200  | 0.80400700  |
| N | 3.00897200  | -0.59726100 | 1.31763500  |
| N | -3.09365900 | -0.37975500 | 1.23206800  |
| H | 6.96828300  | -1.63027200 | 0.39682800  |
| H | 5.52637800  | -0.53659600 | -2.78678500 |
| H | -7.12858600 | 0.95771500  | -1.01948100 |
| H | -5.45874900 | -2.22451300 | -1.70860200 |
| H | -1.55477300 | 3.12999600  | 0.61878000  |
| H | 1.703904    | 2.990839    | 0.620056    |

### DPA-2Py-SO<sub>2</sub>

| Atoms | x          | y           | z           |
|-------|------------|-------------|-------------|
| C     | 2.80812700 | -0.00431400 | -1.29041100 |
| C     | 1.50333000 | -1.82021800 | -0.84633300 |
| C     | 2.27906100 | -2.20470900 | 0.24872800  |
| C     | 3.38306200 | -1.42025300 | 0.56914000  |
| C     | 3.67423500 | -0.28480700 | -0.20763100 |
| H     | 2.98850100 | 0.85906300  | -1.92508400 |
| H     | 2.02344500 | -3.08940900 | 0.82116400  |
| H     | 4.01595800 | -1.68322000 | 1.41069100  |



|   |             |             |             |
|---|-------------|-------------|-------------|
| S | 0.08472500  | -2.85306400 | -1.33038200 |
| C | -1.38849000 | -1.93348000 | -0.78193500 |
| C | -2.15271000 | -2.44089100 | 0.26991800  |
| C | -2.76541100 | -0.14131500 | -1.08134200 |
| C | -3.29865700 | -1.74070400 | 0.63616000  |
| H | -1.86641300 | -3.36350400 | 0.76230700  |
| C | -3.63501000 | -0.55847000 | -0.04654600 |
| H | -2.97365000 | 0.76995600  | -1.63547900 |
| H | -3.93188400 | -2.10799800 | 1.43740900  |
| O | 0.05511000  | -2.97569600 | -2.79191900 |
| O | 0.14827500  | -4.05400000 | -0.46643900 |
| C | -5.50126700 | 0.88807800  | -0.74028800 |
| C | -5.27241600 | 0.21784800  | 1.61715900  |
| C | -5.91781400 | 2.20981500  | -0.52176700 |
| C | -5.81305800 | 0.25984000  | -1.95580900 |
| C | -6.63570600 | 0.00916000  | 1.87515000  |
| C | -4.40121300 | 0.47068000  | 2.68834100  |
| C | -6.63718800 | 2.88963600  | -1.50581800 |
| C | -6.51730000 | 0.95227700  | -2.94196900 |
| H | -5.50192700 | -0.76682100 | -2.12636700 |
| C | -7.11699200 | 0.05593400  | 3.18463100  |
| C | -4.88689900 | 0.49940400  | 3.99639300  |
| H | -3.34725400 | 0.64588500  | 2.49193200  |
| C | -6.93618200 | 2.26795600  | -2.72197900 |
| H | -6.95358700 | 3.91362000  | -1.32413200 |
| H | -6.74845600 | 0.45492000  | -3.88034700 |
| H | -8.17556400 | -0.10738600 | 3.37001300  |
| C | -6.24657100 | 0.29577100  | 4.25207100  |
| H | -4.20089200 | 0.69624700  | 4.81638600  |
| H | -7.48945800 | 2.80229400  | -3.48937400 |
| H | -6.62318600 | 0.32557300  | 5.27081000  |
| C | 4.72246800  | 1.94217800  | -0.18664300 |
| C | 5.97496000  | -0.01756600 | 0.61959700  |
| C | 5.78578500  | 2.58419900  | -0.83903300 |
| C | 3.61406300  | 2.69650600  | 0.22825500  |
| C | 6.59849400  | 0.60060200  | 1.71387500  |
| C | 6.54379400  | -1.17578300 | 0.06740300  |
| C | 5.73856000  | 3.95981200  | -1.06989300 |
| C | 3.56634400  | 4.06873900  | -0.02177700 |
| H | 2.79299500  | 2.20587600  | 0.74319600  |
| C | 7.77494700  | 0.06758200  | 2.24355300  |
| C | 7.71095800  | -1.71227600 | 0.61304600  |
| H | 6.07161800  | -1.65031600 | -0.78809700 |
| C | 4.62827100  | 4.70860900  | -0.66812100 |
| H | 6.56854000  | 4.44427900  | -1.57783200 |
| H | 2.70004400  | 4.64015600  | 0.30164300  |
| H | 8.24844000  | 0.55690200  | 3.09093400  |
| C | 8.33455000  | -1.09296400 | 1.70077500  |

|   |             |             |             |
|---|-------------|-------------|-------------|
| H | 8.14077900  | -2.60969200 | 0.17551400  |
| H | 4.59091400  | 5.77803800  | -0.85641000 |
| H | 9.24711300  | -1.50897200 | 2.11880200  |
| N | -4.78080300 | 0.18744900  | 0.27648400  |
| N | 4.78005800  | 0.53701800  | 0.06592900  |
| N | -1.67777400 | -0.81650000 | -1.44216900 |
| N | 1.75242600  | -0.75262200 | -1.59784800 |
| H | 6.16100700  | 1.49784600  | 2.14186200  |
| H | 6.64435800  | 2.00267800  | -1.16171400 |
| H | -7.31257900 | -0.18573300 | 1.04853800  |
| H | -5.677657   | 2.697649    | 0.418439    |
